# Supplementary material for: The distinct roles of two intertidal foraminiferal species in phytodetrital carbon and nitrogen fluxes – results from laboratory feeding experiments
Source: Copernicus journal article supplement (doi:10.5194/bg-2018-231), 2018-05-28
Supplement: Supplementary file [file bg-2018-231-AC1-supplement.pdf]

# The distinct roles of two intertidal foraminiferal species in phytodetrital carbon and nitrogen fluxes - results from laboratory feeding experiments

Julia Wukovits<sup>1</sup>, Max Oberrauch<sup>1</sup>, Annekatrin J. Enge<sup>1</sup>, Petra Heinz<sup>1</sup>

5 <sup>1</sup> University of Vienna, Department of Palaeontology, Althanstrasse 14, 1090 Vienna, Austria

Correspondence to: Julia Wukovits (julia.wukovits@univie.ac.at)

**Abstract.** Benthic foraminifera play a major role as primary consumers and detritivores redistributing organic carbon and nitrogen in intertidal environments. Here we compared the differences of phytodetrital carbon and nitrogen intake and turnover of two dominant intertidal foraminifera, *Ammonia tepida* and *Haynesina germanica*. Their lifestyles in relation to feeding  
10 behaviour (feeding preferences, intake and turnover of phytodetrital carbon and nitrogen) and temperature adaptations were compared to obtain a closer definition of their specific roles in intertidal organic matter processing. For this comparison, we carried out a series of short-term laboratory incubations with stable isotope labelled (<sup>13</sup>C & <sup>15</sup>N) detritus as food source. We compared the response of the two species to diatom detritus at three different temperatures (15°C, 20°C, 25°C). *Ammonia tepida* showed a very high, temperature-influenced intake and turnover rates with more excessive carbon turnover, compared  
15 to nitrogen. The quite low metabolic nitrogen turnover in *H. germanica* was not affected by temperature and was higher than the carbon turnover. This might be related with the chloroplast husbandry in *H. germanica* and its lower demands for food derived nitrogen sources. *Ammonia tepida* prefers a soft chlorophyte food source over diatom detritus, which is harder to break down. In conclusion, *A. tepida* shows a generalist behaviour that links with high fluxes of organic matter (OM). Due to its high rates of OM processing and abundances, we conclude that *A. tepida* is an important key-player in intertidal carbon and nitrogen  
20 turnover, specifically in the short-term processing of OM and the mediation of dissolved nutrients to associated microbes and primary producers. In contrast, *H. germanica* is a highly specialized species with low rates of carbon and nitrogen budgeting.

## 1 Introduction

Benthic foraminifera are ubiquitous marine protists and highly abundant in coastal sediments (Lei et al., 2014; Mojtahid et al., 2016; Murray and Alve, 2000). Coastal sediments represent the largest pool of marine particulate organic matter (OM), despite  
25 their rather small area (less than 10% of the ocean floor), and play an essential role in global carbon and nitrogen cycles (Jahnke, 2004). Oceanic and terrestrial systems are connected by the carbon cycling in coastal waters, which contribute to a major part of the global carbon cycles and budgets (Bauer et al., 2013; Cai, 2011; Cole et al., 2007; Regnier et al., 2013). Estuaries are an important source for organic matter in coastal systems and were estimated to account for ~ 40% of oceanic phytoplankton primary productivity (Smith and Hollibaugh, 1993). Most estuarine areas are considered to be net heterotrophic,

30 or act as carbon sinks, respectively (Caffrey, 2003, 2004; Cai, 2011; Herrmann et al., 2015). In general, 30% of overall coastal  
carbon is lost by metabolic oxidation (Smith and Hollibaugh, 1993). Foraminifera are highly abundant in estuarine sediments  
and contribute strongly to these processes (Alve and Murray, 1994; Cesbron et al., 2016; Moodley et al., 2000; Murray and  
Alve, 2000). They feed on various sources of labile particulate OM, including microalgae and detritus, and provide a pivotal  
link in marine carbon cycles and food webs (Bradshaw, 1961; Goldstein and Corliss, 1994; Heinz, 2001; Lee et al., 1966; Lee  
35 and Muller, 1973; Nomaki et al., 2005a, 2005b, 2006, 2009, 2011). The nitrogen compounds of OM particles are usually  
remineralized to ammonium (NH<sub>4</sub><sup>+</sup>). In this way, nitrogen gets again available as nutrient for primary productivity. A major  
part of this process is attributed to prokaryotic degraders, but protists are also involved in the process of regeneration of organic  
nitrogen compounds (Ferrier- Pages and Rassoulzadegan, 1994; Ota and Taniguchi, 2003; Verity et al., 1992). Due to their  
high abundances, we consider, that foraminifera contribute a large part to this OM reworking and the regeneration of carbon  
40 and nitrogen compounds from particulate OM sources, e.g. phytodetritus. In this study, we quantify the bulk OM-derived  
carbon and nitrogen release, which originates rather via excretion of organic carbon and nitrogen compounds (vesicular  
transport of metabolic waste products), respiration or diffusion of inorganic carbon and nitrogen by these single celled  
microorganisms.

Environmental conditions of temperate tidal flats are physiologically challenging (high fluctuations of physical and chemical  
45 parameters, e.g. temperature and/or OM quality) and therefore host very few, highly adapted foraminifera species.  
Monospecific or near monospecific foraminiferal communities are characteristic for temperate, estuarine regions (Alve and  
Murray, 1994, 2001; Hayward, 2014; Martins et al., 2015; Saad and Wade, 2017). *Ammonia tepida* and *Haynesina germanica*  
are typical representatives of these communities and their standing crop can reach more than 150 individuals per cm<sup>3</sup> (Alve  
and Murray, 2001; Mojtahid et al., 2016; Wukovits et al., 2018). Typically, tidal flats offer a high availability of food sources  
50 for phytodetrivores or herbivores feeding on microalgae. But dense populations of *A. tepida* communities can deplete  
sediments from OM sources and consequently control benthic meiofaunal community structures (Chandler, 1989). Therefore,  
resource partitioning or different metabolic strategies can be beneficial for foraminifera which share the same spatial and  
temporal habitats.

Early experimental investigations and monitoring studies suggest feeding preferences or selective feeding in littoral  
55 foraminifera. However, these studies rely on indirect observations from environmental monitoring  
(Hohenegger et al., 1989; Papaspyrou et al., 2013) or from a laboratory study focusing on the more diverse saltmarsh  
communities (Lee and Muller, 1973). The latter study revealed, that foraminiferal salt marsh communities are characterized  
by highly specialized feeding strategies. Analogically, the close spatial coexistence of *A. tepida* and *H. germanica* might be  
also based on different feeding strategies and different preferences of other environmental variables.

60 A major, important difference between the two species subject to this study is the fact, that *H. germanica* hosts functional  
plastids derived from ingested microalgae  
(Jauffrais et al., 2016; Lopez, 1979), a phenomenon known as kleptoplasty, which was first described for a sacoglossan  
opisthobranch (Trench, 1969). It was shown, that diatom-derived chloroplasts in the cytoplasm of *H. germanica* retain their

function (as photosynthetically active kleptoplasts) for up to two weeks (Jauffrais et al., 2016). Further, there is recent proof  
65 that *H. germanica* takes up inorganic carbon and nitrogen sources ( $\text{HCO}_3^-$  and  $\text{NH}_4^+$ ) from the surrounding seawater, most  
likely to generate metabolites in autotrophic-heterotrophic interactions with its kleptoplasts (LeKieffre et al., 2018).  
Consequently, the mixotrophic lifestyle of *H. germanica* might lead to a lower demand of carbon and nitrogen sources and  
thus to a lower ingestion of various particulate OM sources as food sources. In contrary, food-derived chloroplasts in *A. tepida*  
70 lose their photosynthetic activity after a maximum of 24 hours (Jauffrais et al., 2016). Species of the genus *Ammonia* are  
described to take up significant amounts of microalgae and phytodetritus of different origin. Laboratory feeding experiments  
have shown, that *A. tepida* responds to several food sources, including different live microalgae (chlorophytes and diatoms)  
and chlorophyte and diatom detritus (Bradshaw, 1961; LeKieffre et al., 2017; Linshy et al., 2014; Pascal et al., 2008; Wukovits  
et al., 2017, 2018). Whereas, *H. germanica* shows a low affinity to chloroplast detritus food sources (Wukovits et al., 2017),  
but feeds actively on diatoms (Ward et al., 2003) and takes up inorganic, dissolved carbon and nitrogen compounds (LeKieffre  
75 et al., 2018). Both species are found in muddy coastal sediments containing high loads of nutrients or OM (Armynot du Chatelet  
et al., 2009; Armynot du Châtelet et al., 2004). But considering their different feeding strategies, both species might play  
distinct roles in the reworking of OM. Recent literature still lacks direct, quantitative comparisons of foraminiferal species-  
specific OM-derived C & N ingestion and release. Therefore, this study aims to compare and quantify variations in their  
respective uptake of OM (phytodetritus).

80 Temperature has a strong impact on metabolic rates and can therefore play another major role in niche separation or in species-  
specific adaptations in the consumer community. Benthic foraminifera show strong metabolic responses to temperature  
fluctuations (Bradshaw, 1961; Cesbron et al., 2016; Heinz et al., 2012). Therefore, seasonal temperature fluctuations and  
human induced global warming can have a strong impact on foraminiferal community compositions and foraminiferal carbon  
and nitrogen fluxes. In estuaries e.g. temperature acts in many cases as the most controlling factor on metabolic rates and on  
85 net ecosystem metabolism (Caffrey, 2003). To examine the effect of temperature on foraminiferal OM processing, temperature  
variations were included in our studies. In summary, the aim of this study was to obtain a closer definition of the ecological  
feeding niches of *A. tepida* and *H. germanica* in relation to intertidal fluxes of OM and OM processing at different  
temperatures. Additionally, this study offers the first estimates for the release of OM derived carbon and nitrogen in  
foraminifera. To reach our aim, we carried out laboratory feeding experiments with stable isotope labelled ( $^{13}\text{C}$  &  $^{15}\text{N}$ ) food  
90 sources (chlorophyte detritus: *Dunaliella tertiolecta*, diatom detritus: *Phaeodactylum tricorutum*). We compared diatom  
detritus intake and retention of phytodetrital carbon (pC) and nitrogen (pN) of *A. tepida* and *H. germanica* at three different  
temperatures (15°C, 20°C, 25°C). The evaluation of the metabolic costs of pC and pN during a 24 hour starvation period can  
further help to explain species specific OM processing due to metabolic nutrient budgets. Further, both food sources were  
offered simultaneously to *A. tepida* to identify feeding preferences of this species. Finally, we collected quantitative data of  
95 the abundances of both species in the sampling area to estimate species-specific contributions to intertidal fluxes of OM-  
derived carbon and nitrogen.

## 2 Material and Methods

### 2.1 Sampling area & sample preparation

The sampling area is located at the Elbe river estuary in the German Wadden Sea (Fig. 1). Samples were collected at low tide  
100 in April 2016, close to the shoreline. Three sediment cores (4.5 cm diameter) were taken in random spacing within an area of  
~ 4 m<sup>2</sup>. The uppermost centimetre of the cores was fixed with a mixture of ethanol and Rose Bengal to stain the cytoplasm of  
live foraminifera. At the University of Vienna, the sediment core material was sieved to obtain size fractions of 125 – 250 µm,  
250 – 355 µm and < 355 µm. Brightly stained (living) foraminifera were identified and counted to calculate abundances  
(individuals per m<sup>2</sup>) to estimate the relevance of *A. tepida* and *H. germanica* in intertidal OM fluxes.

105 For the laboratory experiments, sediment was collected at low tide from the uppermost sediment layer and sieved in the field  
over 125 µm and 500 µm to remove larger meiofauna and organic components. Sampling trips to collect material for laboratory  
experiments were done in April 2015 and 2016. The sediment was filled into plastic containers with seawater and transported  
back to the University of Vienna. The sediment samples were kept within aquaria, containing filtered water collected at the  
sampling site. Foraminifera were picked from the sediment in sufficient number and collected in crystallizing dishes,  
110 containing a layer of North Sea sediment (< 63 µm) and filtered North Sea water (NSW). They were fed with a mixture of live  
*D. tertiolecta* and *P. tricorntutum* once to twice a week until the beginning of the experiments. Live individuals were identified  
by showing bright and intensive cytoplasm colour, cyst formation (in case of *A. tepida*), material gathered around the aperture,  
and movement tracks in the sediment. The experiments started after accumulation of sufficient foraminiferal material three  
weeks after the field sampling.

### 115 2.2 Production of artificial phytodetritus

Labelled food was produced by growing *D. tertiolecta* and *P. tricorntutum* (SAG 1090-1a) in stable isotope-enriched growth  
medium. Algae were cultured in sterile 5 L Erlenmeyer bottles, containing F1/2 growth medium (Guillard, 1975; Guillard and  
Ryther, 1962) enriched with aliquots of 98 atom%NaH<sup>13</sup>CO<sub>3</sub> and 98 atom%Na<sup>15</sup>NO<sub>3</sub> (SigmaAldrich). The algae culture  
medium for Experiment 1 (*P. tricorntutum*) was produced with filtered NSW and enriched with 0.6 mM NaH<sup>13</sup>CO<sub>3</sub> and 0.9  
120 mM NaNO<sub>3</sub> (Na<sup>14</sup>NO<sub>3</sub> : Na<sup>15</sup>NO<sub>3</sub> → 5.25 : 1), along with the stock solutions for the F/2 standard protocol. The culture medium  
for *D. tertiolecta* (<sup>13</sup>C single labelled) in Experiment 2 was produced with filtered NSW, the stock solutions according to the  
F/2 standard protocol, and additionally enriched with 1.5 mM NaH<sup>13</sup>CO<sub>3</sub> and for *P. tricorntutum* (<sup>15</sup>N single labelled) with 1.5  
mM NaHCO<sub>3</sub> (natural abundance) and with 0.9 mM NaNO<sub>3</sub> (Na<sup>14</sup>NO<sub>3</sub> : Na<sup>15</sup>NO<sub>3</sub> → 5.25 : 1) along with the stock solutions  
for the F/2 standard protocol. The algae cultures were incubated at 20°C (type ST 2 POL-ECO Aparatura incubation chambers)  
125 at a 18 hrs:6 hrs light:dark cycle and bubbled with ambient air. Cultures were harvested at stationary growth (after 14-16 days)  
by centrifugation, washed three times in sterile, carbon and nitrogen free artificial seawater, shock frozen with liquid nitrogen,  
and lyophilized to get <sup>13</sup>C and <sup>15</sup>N-labeled phytodetritus (cf. Wukovits et al., 2017). Three batches of algae were produced.

Final isotopic concentrations were: *P. tricornutum* 7 atom%  $^{13}\text{C}$  and 15 atom%  $^{15}\text{N}$  (Experiment 1), *D. tertiolecta* 22 atom%  $^{13}\text{C}$  (Experiment 2), and *P. tricornutum* 14 atom%  $^{15}\text{N}$  (Experiment 2).

### 130 **2.3 Experiment 1: Nutrient demand and temperature response of *A. tepida* and *H. germanica***

Fifty to fifty five specimens of *A. tepida* and or *H. germanica* respectively, of the size fraction 250 – 355  $\mu\text{m}$  were distributed into separate wells on a 6 well plate, containing NSW (12 mL per well, salinity: 28 PSU, practical salinity units, which lies in the range of our measurements from seawater at the sampling site: 24 – 30 PSU). In total, triplicate samples were prepared. The food source, *P. tricornutum* (1.5 g dry weight  $\text{m}^{-2}$ ) was added into each well. Wells were then covered with a headspace  
135 to prevent evaporation and were incubated at 15°C, 20°C or 25°C (Table 1). The specimens were incubated at a 12 hrs : 12 hrs light:dark cycle, starting the incubation with the light cycle. Two equal setups were prepared for incubation. The first setup was terminated after a 24 hour incubation period to determine the intake of *P. tricornutum* detritus per species and temperature ('24 hrs fed'). The experimental period of 24 hours was chosen to avoid potential bacterial activity and to maintain system stability. The specimens were removed from the wells, transferred to Eppendorf© tubes and frozen at -20°C. The specimens  
140 of the second setup were washed three times in carbon and nitrogen free artificial seawater after the 24 hour incubation period and transferred to crystallizing dishes (9 cm diameter), containing 150 mL filtered NSW and covered with parafilm. Subsequently, the dishes were incubated for another 24 hours (15°C, 20°C, 25°C; 12 hours light, 12 hours dark, starting with the light cycle) without food. These samples were analysed to determine the remaining phytodetrital carbon and nitrogen after a 24 hour starvation period ('24 hrs starved').

### 145 **2.4 Experiment 2: Feeding preferences of *A. tepida***

This experiment was carried out at 20°C, since *A. tepida* specimens collected in this area showed a good feeding response at this temperature (Wukovits et al., 2017). *Ammonia tepida* individuals were incubated at 20°C within 6 well plates (55 individuals per triplicate/well, size fraction 250 – 355  $\mu\text{m}$ ). Each well was filled with 12 mL NSW. After acclimation of the individuals within the plates, three different dietary setups were established (Table 1). The first diet consisted of chlorophyte  
150 derived detritus, uniformly  $^{13}\text{C}$  labelled (*D. tertiolecta*, 1.5 g dry weight  $\text{cm}^{-2}$ ), the second was diatom detritus (*P. tricornutum*, 1.5 g dry weight  $\text{cm}^{-2}$ ), uniformly  $^{15}\text{N}$  labelled, and the third consisted of a homogenized mixture of both food sources (0.73 g  $\text{cm}^{-2}$  each). The differential labelling approach allows calculation of nutrient uptake for the distinct phytodetritus source after determination of respective algal carbon and nitrogen composition. Triplicate samples were taken after 1 hour, 3 hours, 6 hours, 12 hours, and 24 hours, and specimens were frozen at -20°C for subsequent isotope ( $^{13}\text{C}/^{12}\text{C}$  and  $^{15}\text{N}/^{14}\text{N}$ ) and elemental  
155 analysis (total organic carbon (TOC) and total nitrogen (TN)). Similarly as in Experiment 1, plates were incubated at a 12 hrs : 12 hrs light:dark cycle, starting the incubation with the light cycle. The algal C:N ratio was used to calculate the pN aliquot for pC of the  $^{13}\text{C}$  labelled chlorophyte and pC for the  $^{15}\text{N}$  labelled diatom food source, for a better visual comparison of the food intake (this serves as a rough estimate of equivalent pC or pN intake at the two diets). This experiment was solely carried

160 out with *A. tepida*, since the sediment did not contain sufficient individuals of *H. germanica* to set up a parallel run with this species.

## 2.5 Sediment core data and foraminiferal abundances

Sediment core samples (uppermost cm) were sieved to fractionate size classes (125 – 250 µm, 250 – 355 µm, < 355 µm). Rose Bengal-stained individuals were counted for each size fraction to obtain abundance data for the live foraminiferal community at the sampling date. Budget data from the laboratory experiments (individual TOC, TN, pC, pN), together with the foraminiferal abundances counted from the sediment cores, were used to estimate the range of foraminiferal contributions to sedimentary carbon and nitrogen pools and fluxes. In case of *H. germanica*, these contributions were only estimated for the 250 – 355 µm fraction (as used in laboratory experiments). For *A. tepida*, the 125 – 250 µm fraction was included to the estimation, using size fraction and feeding relationships from Wukovits et al. (2018). Further, the abundances of *A. tepida*, as derived by the latter study, were compared with the recent study.

## 170 2.6 Sample preparation and isotope analysis

Prior to cytoplasm isotope analysis, foraminifera were carefully cleaned from adhering particles in carbon and nitrogen free artificial seawater, rinsed with ultrapure water in a last cleaning step to remove salts, transferred to tin capsules, and dried at 50°C for several hours. Subsequently, the foraminifera were decalcified with 10 – 15 µL 4 % HCl, and kept at 50°C for three days in a final drying step (Enge et al., 2014, 2016; Wukovits et al., 2017, 2018). The optimum range for isotope and elemental analysis was 0.7 – 1.0 mg cytoplasmic dry weight. In the 250 µm size fraction, 30 – 40 individuals met this criterion. Tools for preparation (hairbrush, needles, tin capsules, tweezers) were rinsed with dichloromethane (CH<sub>2</sub>Cl<sub>2</sub>) and methanol (CH<sub>4</sub>O) (1:1, v:v). Glassware for microscopy was combusted at 500°C for 5h. The samples were analysed at the Large-Instrument Facility for Advanced Isotope Research at the University of Vienna (SILVER). Ratios of <sup>13</sup>C/<sup>12</sup>C, <sup>15</sup>N/<sup>14</sup>N and the content of organic carbon and nitrogen were analysed with an Isotope Ratio Mass Spectrometer (IRMS; DeltaPLUS, Thermo Finnigan) coupled with an interface (ConFlo III, Thermo Finnigan) to an elemental analyzer (EA 1110, CE Instruments). Isotope ratio data, the Vienna Pee Dee Belemnite standard for C (RVPDB = 0.0112372) and the standard for atmospheric nitrogen for N (R<sub>atm</sub>N = 0.0036765) were used to calculate atom% of the samples, where X is <sup>13</sup>C or <sup>15</sup>N:

$$\text{atom}\%X = \frac{100 \times R_{\text{standard}} \times \left( \frac{\delta X_{\text{sample}}}{1000} + 1 \right)}{1 + R_{\text{standard}} \times \left( \frac{\delta X_{\text{sample}}}{1000} + 1 \right)}, \quad (1)$$

185 Intake of pC and pN into foraminiferal cytoplasm was calculated by determining the excess (*E*) of isotope content within the samples using natural abundance data and data of enriched samples (Middelburg et al., 2000):

$$E = \frac{(\text{atom}\%X_{\text{sample}} - \text{atom}\%X_{\text{background}})}{100}, \quad (2)$$

where *X* is <sup>13</sup>C or <sup>15</sup>N. Excess and content of total organic carbon and nitrogen (TOC and TN per individual) were used to calculate incorporated isotopes (*I*<sub>iso</sub>) derived from the food source:

$$I_{iso} = E \times TOC \text{ (or TN)} \quad (3)$$

190 The amount of pC ( $\mu\text{g ind}^{-1}$ ) and pN ( $\mu\text{g ind}^{-1}$ ) within foraminiferal cytoplasm was calculated as follows (Hunter et al., 2012):

$$pX = \frac{I_{iso}}{\left(\frac{\text{atom}\%X_{\text{phyto}}}{100}\right)} \quad (4)$$

## 2. 7 Statistical analysis

Experiment 1: The temperature effect on pC and pN within the foraminiferal cytoplasm, and pC:pN was tested using  
 195 permutation tests and pairwise permutation tests for post-hoc testing (r package rcompanion). Homogeneity of variances was  
 tested using Fligner Killeen test. Relationships of pC and pN after feeding and starvation were explored using linear regression  
 for both species, to observe if pC and pN processing are coupled processes in the two species. Finally, the relative amount of  
 food source-derived carbon and nitrogen after 24 hours starvation was evaluated, to compare the metabolic carbon and nitrogen  
 loss from the two species during the period without food.

200 Experiment 2: To describe and compare uptake dynamics for the different diets, Michaelis Menten curves were applied on pC  
 and pN data. The models were tested by applying the lack-of fit method (R package drc). To compare pC and pN values for  
 both diets, pN was calculated from pC for *D. tertiolecta*, and pC from pN for *P. tricorutum*. Hereby acquired estimates for  
 pC and pN might be underestimated or overestimated respectively, due to possible differences in the ratios of carbon:nitrogen  
 excretion or remineralisation, respectively.

## 205 3 Results

### 3.1 Experiment 1: Nutrient demand and temperature response of *A. tepida* and *H. germanica*

Phytodetrital pC and pN levels derived from *P. tricorutum* detritus was 2 – 5 times higher in *A. tepida* compared to *H.*  
*germanica* (Fig. 2 a, b). Different incubation temperatures resulted in significant effects on pC levels after 24 hours feeding  
 and 24 hours starvation in both species. *Ammonia tepida* showed a significantly lowered pC content when feeding at 25°C  
 210 (Fig. 2 a, *A. tepida*, 24 hrs fed,  $p < 0.05$ ). The 24 hour incubation period with no food resulted in significantly lowered pC  
 levels at 20°C and 25°C (Fig. 2 a, *A. tepida*, 24 hrs starved,  $p < 0.05$ ). In *H. germanica*, the 24 hours feeding period had a  
 similar effect like on *A. tepida*, resulting in significantly lowered pC levels at 25°C (Fig. 2 a, *H. germanica*, 24 hrs fed,  $p <$   
 $0.05$ ). A strong effect of increased temperature after the starvation period was present at 25°C (Fig. 2 a, *H. germanica*, 24 hrs  
 starved,  $p < 0.05$ ).

215 The pN levels in *A. tepida* were considerably affected by temperature after feeding and starvation, whereas there was no  
 apparent effect on *H. germanica* pN levels, neither after feeding, nor after incubation without food (Fig. 2 b). *Ammonia tepida*  
 reacted with simultaneously lowered pN and pC levels at 25°C after feeding and starvation (Fig. 2 b, *A. tepida*,  $p < 0.05$ ).

The ratios of pC:pN were affected by temperature in both species during feeding and starvation (Fig. 2 c,  $p < 0.05$ ). Increased temperatures promoted a drop of pC:pN ratios in *A. tepida* during the starvation period (Fig. 2 c, *A. tepida*,  $p < 0.05$ ). In contrast, temperature specific pC:pN ratios in *H. germanica* showed no change between the incubations with food (24 hrs fed), and the starvation period (24 hrs starved; Fig. 2 c, *H. germanica*). Ratios of C:N show significant temperature related changes in *H. germanica* ( $p < 0.05$ ), but not in *A. tepida* (Fig. 2 d). The relatively high pN content in *A. tepida* also shows a steeper relationship of cytoplasmic pN and pC, compared to *H. germanica* (Fig. 3 a). Further, there is a far higher metabolic turnover of pC and pN in *A. tepida* than in *H. germanica*, specifically at 20°C (Fig. 3 b).

### 225 3.2 Experiment 2: Feeding preferences of *A. tepida*

Michaelis Menten curves fitted with no significant deviation of variance within the sample replicates. Enrichment of algal nutrients in foraminiferal cytoplasm were highest when a single diet of *D. tertiolecta* was available (Fig. 4 a). Here, saturation levels (max. 180 ng C ind<sup>-1</sup>) were already reached within three hours after detritus introduction and half saturation with pC in *A. tepida* was reached after 0.6 hours (Table 2). In contrast, a single *P. tricornutum* diet resulted in a slower food intake (Fig. 4 b), with a half saturation of pN levels after 1.4 hours (Table 2). Further, diatom phytodetritus intake resulted in lower levels of pC (max. ~ 80 ng C ind<sup>-1</sup>). In the mixed feeding approach, half saturation of chlorophyte pC was reached after 1.4 hours and diatom pN half saturation was already reached after 0.1 hours. Further, the maximum pC levels of the chlorophyte diet still reached ~ 70 % of those in the single chlorophyte diet, whereas the pN levels of the diatom diet only reached about 30 % of those in the single diatom diet (Fig. 4, Table 2). Chlorophyte intake was faster and higher, both in the single and mixed diet, and diatom pN stagnated already after less than 1 hour in the mixed diet, but after this time period, chlorophyte detritus intake in the mixed diet had continued with increasing pC levels, saturating between 6 and 10 hours (Fig. 4 a, b).

### 3.3 Relevance of *A. tepida* and *H. germanica* in intertidal OM fluxes

Data for the live foraminiferal community in 2016 from the three stained sediment cores showed a typical, low biodiversity mudflat community consisting of *A. tepida*, *H. germanica* and very low abundances of *Elphidium williamsonii* (< 1258 ind m<sup>-2</sup>, all size fractions). Abundances of *A. tepida* and *H. germanica* were equal and decreased with increasing size fraction. The calculated total biomass of live foraminifera in units of TOC is max. ~ 120 mg C m<sup>-2</sup> (both species, all size fraction, Table 3). From combining in situ abundances and pC values from Experiment 1 (15°C), this foraminiferal community has the potential to take up at least 4 ~ mg C m<sup>-2</sup> d<sup>-1</sup>, when taking only diatom detritus into account. The contribution of *H. germanica* to this OM processing is only at about 15 %.

## 245 4 Discussion

Different ecologic lifestyles or adaptations to environmental parameters are important organismic attributes to avoid inter- and intra-specific competition. Further, different metabolic adaptations result in species-specific rates of organic matter turnover.



Our results clearly demonstrate, that food resource partitioning and different temperature adaptations contribute to the fluctuating, temporal distribution and abundance of *A. tepida* and *H. germanica*. Due to these specific adaptations, both species play different roles in intertidal organic matter fluxes. There are, however, limitations for the interpretation of results derived from laboratory incubations. A laboratory setup cannot reproduce natural conditions completely. Therefore, the foraminiferal responses might deviate slightly from their natural behaviour. However, laboratory experiments enable the analysis of the direct response of specimens to a single factor, while maintaining other factors stable. To enable a compatible comparison, we incubated freshly sampled individuals at stable, near natural conditions. Both tested food sources are considered good food sources for intertidal foraminifera (Lee et al., 1966). *Dunaliella tertiolecta* is commonly used in feeding experiments with foraminifera due to its easy culturing. *Phaeodactylum tricorutum*, which represents a more stable (due to the silicate frustule) source of OM, is a common food source of intertidal foraminifera (Murray, 1963). Additional tested food sources would give a more comprehensive picture, but there were limitations in time and material. In the following sections, our results are discussed with respect to these restrictions.

#### 4.1 Experiment 1: Nutrient demand and temperature response of *A. tepida* and *H. germanica*

Experiment 1 shows clear differences in the amount of phytodetritus intake and different carbon and nitrogen budgeting between the two species (Fig. 2, Fig. 3). *Ammonia tepida* has a higher affinity to the diatom detritus food source with a three times higher intake of diatoms at the two lower temperatures compared to *H. germanica*. This lower food intake by *H. germanica* could be explained by the mixotrophic lifestyle of this species. *Haynesina germanica* is known to host kleptoplasts, exploiting the photosynthetic activity of ingested chloroplasts as an additional energy source (Lopez, 1979; Pillet et al., 2011). This species might therefore utilize nutrients (carbohydrates) derived from the photosynthetic activity of incorporated chloroplasts (Cesbron et al., 2017). This lifestyle could cause a lower demand for and lower turnover of OM as food source (Cesbron et al., 2017). In our study, the pC intake in *H. germanica* was ~ 67% lower than that of *A. tepida* (Fig. 2). Highly specialized sea slugs use plastids as energy reservoirs at times of low food availability (Cartaxana et al., 2017; Hinde and Smith, 1972; Marín and Ros, 1993), where carbon supply from chloroplasts can cover 60% of total carbon input (Raven et al., 2001). In kleptoplast hosting sea slugs, free  $\text{NH}_4^+$  from the seawater is a primary source for the generation of amino acids via kleptoplast metabolism within the slug (Teugels et al., 2008). A similar mechanism in *H. germanica* might explain the high relative turnover of pN (Fig. 3b). Phytodetrital nitrogen might therefore be disposed at a higher rate in a relatively temperature independent process, probably in the form of dissolved organic nitrogen, further causing higher pC:pN ratio in the cytoplasm of *H. germanica* (Fig. 2).

In addition to the higher rates of phytodetritus intake, *A. tepida* shows a considerably higher metabolic turnover of pC and pN than *H. germanica* (Fig. 3b). According to Cesbron et al. (2016), respiration rates (normalized to  $\text{pmol mm}^{-3} \text{d}^{-1}$ ) are about 2 – 12 times higher in *A. tepida* specimens than in *H. germanica* specimens from the same location. In this study, a 4 - 7 times higher release of phytodetritus-derived pC per individual and day (size fraction 250 – 355  $\mu\text{m}$ ) was observed in *A. tepida*. Interestingly, this study shows similar reactions of both species in carbon loss due to increased temperature. An earlier study

on the temperature effect on *D. tertiolecta* detritus intake of the two species showed a higher sensitivity to increased temperatures in *H. germanica*, and far lower rates of chlorophyte detritus intake compared to this study (Wukovits et al., 2017). In contrast, *A. tepida* seems to be more tolerant to higher temperatures when feeding on chlorophyte detritus. The results of Experiment 1 suggest a niche separation of the two species with respect to phytodetritus or OM availability and temperature.

#### 285 **4.2 Experiment 2: Feeding preferences of *A. tepida***

The findings of Experiment 2 suggest that *A. tepida* might prefer OM food sources, which are easy to exploit and to break down. The high intake values in the *D. tertiolecta* mono-diet one hour after incubation and the saturation of cytoplasmic pC levels after three hours indicate a high affinity to chlorophyte detritus (Fig. 4, Table 2). Earlier studies also observed quick and high ingestion rates of chlorophyte detritus (*Chlorella* sp.) by the genus *Ammonia* (Linshy et al., 2014; Wukovits et al., 2017, 290 2018). The fast saturation with diatom detritus after one hour in the mixed diet and the advanced and high intake of *D. tertiolecta* could even indicate an avoidance of *P. tricornutum* and selective feeding on *D. tertiolecta*. Probably, the soft cells of chlorophytes enable a faster and easier metabolic processing of this food source compared to the harder diatom frustules. The recognition of such food sources could be achieved by chemosensory behaviour of the foraminifera (cf. Langer and Gehring, 1993) and the attraction to specific substances attached to, or leaking from the food particles, similar to some other 295 protists, which react to food-specific amino acids (Almagor et al., 1981; Levandowsky et al., 1984). Microalgal communities in tidal sediments typically consist of microphytobenthic diatoms, which are considered to be the main food source for intertidal foraminifera. An isotope labelling study has shown that diatoms (*Navicula salinicola*) are taken up by *A. tepida* at high rates, but the complete release of the content of the diatom frustules can take several days (LeKieffre et al., 2017). This might not fit the nutrient demands of *A. tepida* at times of high metabolic activity. Therefore, a shift from microphytobenthos to particulate 300 OM from riverine or tidal transport might be a feeding strategy in *A. tepida*. Specifically at higher temperatures, when more energy is needed to maintain metabolic activities.

In general, food sources of *A. tepida* include microalgae, phytodetritus, bacteria and sometimes metazoans (Bradshaw, 1961; Dupuy et al., 2010; Moodley et al., 2000; Pascal et al., 2008). Bacteria are considered to play a minor role in the diet of *A. tepida* (Pascal et al., 2008), and reports on metazoan feeding in *A. tepida* are restricted to a single observation (Dupuy et al., 305 2010). In contrast to *A. tepida*, *H. germanica* does actively ingest bacteria and they can occasionally be preferred over diatoms (Brouwer et al., 2016). Diatoms are reportedly taken up by *H. germanica*, and conical test structures serve as tools to crack diatom frustules open (Austin et al., 2005; Ward et al., 2003). These chloroplasts derived from diatoms remain as functional kleptoplasts, as mentioned above, within the cytoplasm of *H. germanica*.

#### **4.3 Relevance of *A. tepida* and *H. germanica* for intertidal OM fluxes**

310 Data of foraminiferal abundances or foraminiferal biomass are important variables to estimate foraminiferal nutrient fluxes. In this section, we discuss the relevance of *A. tepida* or *H. germanica* in intertidal fluxes of phytodetrital carbon and nitrogen as estimated from sediment core data in combination with results from the laboratory feeding experiments of this study. The total

biomass of the two species in the sampling area ranges between ~ 116 and > 380 mg TOC m<sup>-2</sup> (size fraction 125-355 µm) at the sampling dates in late April/early May in two consecutive years (Table 3). This lies within the range of estimations for hard-shelled foraminifera in other areas of the Wadden Sea (van Oevelen et al., 2006b, 2006a, TOC max. ~ 160 - 750 mg C m<sup>-2</sup>). Our phytodetritus uptake estimates propose, that the foraminiferal biomass consists of ~ 6 – 8% diatom-derived pC/TOC, with the major amount contained within *A. tepida* (compare Table 3). An *in-situ* feeding experiment with deep-sea foraminifera resulted in values of ~ 1 – 12% pC/TOC (Nomaki et al., 2005b). Similar *in-situ* incubations in the core of the oxygen minimum zone of the Arabian Sea report ~ 15% pC/TOC in epifaunal and shallow infaunal foraminiferal carbon uptake (Enge et al., 2014). *In-situ* incubations offer results closest to the natural responses of organisms in their natural habitat and enable precise estimates of foraminiferal nutrient fluxes. Although, specific microhabitat conditions can have a strong influence on organismic behaviour. The artificial conditions in laboratory experiments also have an influence on physiological analysis, therefore the obtained results should be treated with caution. However, our estimates lie in the same order of magnitude as the above mentioned *in-situ* studies and offer a basis for estimations on foraminiferal carbon and nitrogen fluxes. General variations in foraminiferal carbon and nitrogen budgets can be caused by different adaptations to variable food availability in different habitats. This can be achieved by different controls of energy metabolism (e.g. Linke, 1992) or different trophic strategies (e.g. Lopez, 1979; Nomaki et al., 2011; Pascal et al., 2008). Our results suggest, *A. tepida* has a higher relevance for intertidal OM processing than *H. germanica*. This can be mainly attributed to the sequestered chloroplasts within the cytoplasm of *H. germanica*. Kleptoplasty is a wide spread phenomenon in foraminifera, specifically in species inhabiting dysoxic sediments, where kleptoplasts could promote survival in anoxic pore waters (Bernhard and Bowser, 1999). They might be involved in biochemical pathways within the foraminiferal cytoplasm, e.g. the transport of inorganic carbon and nitrogen (LeKieffre et al., 2018). Further, transmission electron microscopic investigations on *H. germanica* report a very limited abundance of food vesicles (Goldstein and Richardson, 2018). Kleptoplast-bearing species might occupy a distinct niche concerning their energetic demands. Additionally, they might play a not yet discovered importance in the fluxes of inorganic or dissolved carbon and nitrogen compounds. However, secondary producers with high uptake rates and a quick response to particulate OM sources like *A. tepida* play a strong role in the biogeochemical carbon and nitrogen recycling. The high rates of OM carbon and nitrogen turnover are mainly caused by *A. tepida* populations (Table 3). The process of carbon and nitrogen regeneration by OM remineralisation plays an important role in marine biogeochemical cycling. Carbon loss, e.g. due to organismic respiration or OM remineralisation to CO<sub>2</sub>, reduces the availability of organic carbon sources in the heterotrophic food web. As mentioned above, in the heterotrophic, coastal zone 30% of the carbon pool are lost as via respiration. Whereas, dissolved organic carbon sources from organismic excretion can serve as an important nutrient source for bacteria (Kahler et al., 1997; Snyder and Hoch, 1996; Zweifel et al., 1993). Therefore, the fast processing of OM in *A. tepida* might be an important sink for inorganic carbon (CO<sub>2</sub> respiration) and at the same time a link for dissolved organic carbon sources in intertidal carbon and nitrogen fluxes. According to this study, maximum pC flux through *A. tepida* can reach values of ~ 36 mg C m<sup>-2</sup> d<sup>-1</sup> when feeding on chlorophytes at 20°C (estimated from Experiment 2, Fig. 3 relative release, and max. abundances). Therefore, *A. tepida* could contribute up to 10% of the turnover of OM derived from gross particulate

phytoplankton production at the sampling date in April/May 2016, with a gross particulate primary production between ~ 230 – 1500 mg C m<sup>-2</sup> d<sup>-1</sup> (Tillmann et al., 2000). This is comparable with the study of Moodley et al., (2000), where *Ammonia* sp. incorporated ~ 7% within 53 hours in sediment core incubations feeding experiments in sediment incubations with added, labeled chlorophyte detritus.

Planktonic protozoa are the primary regenerators of marine nitrogen, transforming OM-nitrogen to their primary N-excretion product, NH<sub>4</sub><sup>+</sup> (Glibert, 1997). The excretion of NH<sub>4</sub><sup>+</sup> by marine protists can contribute to a large part to the nutritional demands of marine primary productivity (Ferrierpages and Rassoulzadegan, 1994; Ota and Taniguchi, 2003; Verity, 1985). Nitrogen regeneration by protozoa was supposed to play a far higher role than bacterial nitrogen regeneration in the marine microbial food chain (Goldman and Caron, 1985). Indeed, excreted nitrogen can serve as important nutrient sources for microbes (Wheeler and Kirchman, 1986). The release of dissolved organic nitrogen and NH<sub>4</sub><sup>+</sup> by e.g. copepods, can be a major driver for marine microbial production (Valdés et al., 2018). Here, foraminiferal nitrogen excretion values are in the range of estimations for weight-specific NH<sub>4</sub><sup>+</sup> excretion in marine protozoa according to Dolan (1997) (data for foraminiferal weight, comp. supplementary Fig. 2). Due to their high abundances, nitrogen release by *A. tepida* as observed in this study could reach 2.5 mg N m<sup>-2</sup> d<sup>-1</sup> or ~ 73 nmol N dm<sup>-2</sup> h<sup>-1</sup>, respectively, at 15°C and high diatom availability (comp. Table 3). As a rough estimate for *A. tepida* feeding at high abundances and high availability of chlorophyte detritus at 20°C, these values could increase to ~ 22 mg N m<sup>-2</sup> d<sup>-1</sup> or ~ 0.6 μmol N dm<sup>-2</sup> h<sup>-1</sup> (Fig.1, Table 3). Therefore, foraminiferal nitrogen release as NH<sub>4</sub><sup>+</sup> or amino-acids could cover a considerable amount of the nutritional nitrogen demand in marine bacteria (cf. Wheeler and Kirchman, 1986), which assimilate NH<sub>4</sub><sup>+</sup> (and amino acid-derived NH<sub>4</sub><sup>+</sup>) to sustain their glutamate-glutamine cycle. Vice versa, the labile dissolved organic matter derived from bacterial decomposition of refractory organic matter provides a valuable food source for some benthic foraminifera, and is indispensable for the reproduction of some foraminiferal species (Jorissen et al., 1998; Muller and Lee, 1969; Nomaki et al., 2011). In many marine diatoms, which are the main drivers of marine primary productivity, NH<sub>4</sub><sup>+</sup> is the preferred source for nitrogen uptake over NO<sub>3</sub><sup>-</sup> (Sivasubramanian and Rao, 1988). Foraminifera could act as important nutrient providers for closely associated diatoms, which are also considered as one of their main food sources (Lee et al., 1966). Consequently, the kleptoplast-hosting metabolism in *H. germanica* could benefit from regenerated nitrogen sources by the high OM mineralization rates in *A. tepida*. In summary, foraminiferal carbon and nitrogen fluxes constitute an important link in the food web complex of primary consumers and decomposers.

## 5 Conclusions

This study compares differences in the feeding behaviour, nutrient demand, and OM flux of two intertidal foraminiferal species. Our results clearly show that *A. tepida* has a higher impact on the fluxes of phytodetrital carbon and nitrogen in intertidal sediments than *H. germanica*. This can partly be explained by their different lifestyles. Differences in temperature acclimatization or preferences to different food sources can serve as strategies to avoid spatial and temporal interspecific competition, resulting in a niche separation of the two species with respect to phytodetritus or OM availability and temperature.

Accordingly, *H. germanica* could be associated with environmental conditions of moderate availability of microphytobenthos and lower temperatures, as given prior to the diatom spring bloom. Whereas *A. tepida* could take advantage of seasons characterized by higher input of allochthonous OM. Further, temperature fluctuations in combination with allochthonous OM availability have less effect on the carbon and nitrogen processing in *A. tepida*. These differentiations in their metabolic OM processing and lifestyles suggest a far higher relevance of *A. tepida* in the mediation of the fluxes of intertidal carbon and nitrogen.

385

## References

- Almagor, M., Ron, A. and Bar-Tana, J.: Chemotaxis in *Tetrahymena thermophila*, *Cell Motil.*, 1(2), 261–268, doi:10.1002/cm.970010208, 1981.
- Alve, E. and Murray, J. W.: Ecology and taphonomy of benthic foraminifera in a temperate mesotidal inlet, *J. Foraminifer. Res.*, 24(1), 18–27, 1994.
- Alve, E. and Murray, J. W.: Temporal variability in vertical distributions of live (stained) intertidal foraminifera, southern England, *J. Foraminifer. Res.*, 31(1), 12–24, doi:10.2113/0310012, 2001.
- Armynot du Châtelet, E., Debenay, J.-P. and Souldard, R.: Foraminiferal proxies for pollution monitoring in moderately polluted harbors, *Environ. Pollut. Barking Essex* 1987, 127(1), 27–40, 2004.
- 395 Armynot du Chatelet, E., Degre, D., Sauriau, P.-G. and Debenay, J.-P.: Distribution of living benthic foraminifera in relation with environmental variables within the Aiguillon cove (Atlantic coast, France): improving knowledge for paleoecological interpretation, *Bull. Soc. Geol. Fr.*, 180(2), 131–144, 2009.
- Austin, H. A., Austin, W. E. N. and Paterson, D. M.: Extracellular cracking and content removal of the benthic diatom *Pleurosigma angulatum* (Quekett) by the benthic foraminifera *Haynesina germanica* (Ehrenberg), *Mar. Micropaleontol.*, 57(3–4), 68–73, doi:10.1016/j.marmicro.2005.07.002, 2005.
- 400 Bauer, J. E., Cai, W.-J., Raymond, P. A., Bianchi, T. S., Hopkinson, C. S. and Regnier, P. A. G.: The changing carbon cycle of the coastal ocean, *Nature*, 504(7478), 61–70, doi:10.1038/nature12857, 2013.
- Bernhard, J. M. and Bowser, S. S.: Benthic foraminifera of dysoxic sediments: chloroplast sequestration and functional morphology, *Earth-Sci. Rev.*, 46(1), 149–165, doi:10.1016/S0012-8252(99)00017-3, 1999.
- 405 Bradshaw, J. S.: Laboratory experiments on the ecology of foraminifera, *Contrib. Cushman Found. Foraminifer. Res.*, 7(3), 87–106, 1961.
- Brouwer, G. M., Duijnste, I. A. P., Hazeleger, J. H., Rossi, F., Lourens, L. J., Middelburg, J. J. and Wolthers, M.: Diet shifts and population dynamics of estuarine foraminifera during ecosystem recovery after experimentally induced hypoxia crises, *Estuar. Coast. Shelf Sci.*, 170(Supplement C), 20–33, doi:10.1016/j.ecss.2015.12.015, 2016.
- 410 Caffrey, J. M.: Production, Respiration and Net Ecosystem Metabolism in U.S. Estuaries, *Environ. Monit. Assess.*, 81(1), 207–219, doi:10.1023/A:1021385226315, 2003.
- Caffrey, J. M.: Factors controlling net ecosystem metabolism in U.S. estuaries, *Estuaries*, 27(1), 90–101, doi:10.1007/BF02803563, 2004.
- Cai, W.-J.: Estuarine and Coastal Ocean Carbon Paradox: CO<sub>2</sub> Sinks or Sites of Terrestrial Carbon Incineration?, *Annu. Rev. Mar. Sci.*, 3(1), 123–145, doi:10.1146/annurev-marine-120709-142723, 2011.
- 415 Cartaxana, P., Trampe, E., Köhl, M. and Cruz, S.: Kleptoplast photosynthesis is nutritionally relevant in the sea slug *Elysia viridis*, *Sci. Rep.*, 7(1), 7714, doi:10.1038/s41598-017-08002-0, 2017.
- Cesbron, F., Geslin, E., Jorissen, F. J., Delgard, M. L., Charrieau, L., Deflandre, B., Jézéquel, D., Anschutz, P. and Metzger, E.: Vertical distribution and respiration rates of benthic foraminifera: Contribution to aerobic remineralization in intertidal mudflats covered by *Zostera noltei* meadows, *Estuar. Coast. Shelf Sci.*, doi:10.1016/j.ecss.2015.12.005, 2016.
- 420

- Cesbron, F., Geslin, E., Kieffre, C. L., Jauffrais, T., Nardelli, M. P., Langlet, D., Mabilieu, G., Jorissen, F. J., Jézéquel, D. and Metzger, E.: Sequestered Chloroplasts in the Benthic Foraminifer *Haynesina Germanica*: Cellular Organization, Oxygen Fluxes and Potential Ecological Implications, *J. Foraminifer. Res.*, 47(3), 268–278, doi:10.2113/gsjfr.47.3.268, 2017.
- 425 Chandler, G. T.: Foraminifera may structure meiobenthic communities, *Oecologia*, 81(3), 354–360, doi:10.1007/BF00377083, 1989.
- Cole, J. J., Prairie, Y. T., Caraco, N. F., McDowell, W. H., Tranvik, L. J., Striegl, R. G., Duarte, C. M., Kortelainen, P., Downing, J. A., Middelburg, J. J. and Melack, J.: Plumbing the Global Carbon Cycle: Integrating Inland Waters into the Terrestrial Carbon Budget, *Ecosystems*, 10(1), 172–185, doi:10.1007/s10021-006-9013-8, 2007.
- 430 Dolan, J. R.: Phosphorus and ammonia excretion by planktonic protists, *Mar. Geol.*, 139(1), 109–122, doi:10.1016/S0025-3227(96)00106-5, 1997.
- Dupuy, C., Rossignol, L., Geslin, E. and Pascal, P.-Y.: Predation of Mudflat Meio-Macrofaunal Metazoans by a Calcareous Foraminifer, *Ammonia Tepida* (cushman, 1926), *J. Foraminifer. Res.*, 40(4), 305–312, doi:10.2113/gsjfr.40.4.305, 2010.
- Enge, A. J., Witte, U., Kucera, M. and Heinz, P.: Uptake of phytodetritus by benthic foraminifera under oxygen depletion at the Indian Margin (Arabian Sea), *Biogeosciences*, 11, 2017–2026, doi:doi:10.5194/bgd-10-15305-2013, 2014.
- 435 Enge, A. J., Wukovits, J., Wanek, W., Watzka, M., Witte, U. F. M., Hunter, W. R. and Heinz, P.: Carbon and Nitrogen Uptake of Calcareous Benthic Foraminifera along a Depth-Related Oxygen Gradient in the OMZ of the Arabian Sea, *Aquat. Microbiol.*, 71, doi:10.3389/fmicb.2016.00071, 2016.
- Ferrier-Pages, C. and Rassoulzadegan, F.: N remineralization in planktonic protozoa, *Limnol. Oceanogr.*, 39(2), 411–419, doi:10.4319/lo.1994.39.2.0411, 1994.
- 440 Glibert, P. M.: Interactions of top-down and bottom-up control in planktonic nitrogen cycling, *Hydrobiologia*, 363(1–3), 1–12, doi:10.1023/A:1003125805822, 1997.
- Goldman, J. C. and Caron, D. A.: Experimental studies on an omnivorous microflagellate: implications for grazing and nutrient regeneration in the marine microbial food chain, *Deep Sea Res. Part Oceanogr. Res. Pap.*, 32(8), 899–915, doi:10.1016/0198-0149(85)90035-4, 1985.
- 445 Goldstein, S. T. and Corliss, B. H.: Deposit feeding in selected deep-sea and shallow-water benthic foraminifera, *Deep Sea Res. Part Oceanogr. Res. Pap.*, 41(2), 229–241, doi:http://dx.doi.org/10.1016/0967-0637(94)90001-9, 1994.
- Goldstein, S. T. and Richardson, E. A.: Fine structure of the foraminifer *Haynesina germanica* (Ehrenberg) and its sequestered chloroplasts, *Mar. Micropaleontol.*, 138, 63–71, doi:10.1016/j.marmicro.2017.10.010, 2018.
- 450 Hayward, B. W.: “Monospecific” and near-monospecific benthic foraminiferal faunas, New Zealand, *J. Foraminifer. Res.*, 44(3), 300–315, 2014.
- Heinz, P.: Laboratory feeding experiments: response of deep-sea benthic foraminifer to simulated phytoplankton pulses, *Rev. Paleobiol Geneve*, 20(2), 643–646, 2001.
- Heinz, P., Marten, R. A., Linshy, V. N., Haap, T., Geslin, E. and Kohler, H. R.: 70 kD stress protein (Hsp70) analysis in living shallow-water benthic foraminifera, *Mar. Biol. Res.*, 8(7), 677–681, doi:10.1080/17451000.2011.650177, 2012.

- 455 Herrmann, M., Najjar, R. G., Kemp, W. M., Alexander, R. B., Boyer, E. W., Cai, W.-J., Griffith, P. C., Kroeger, K. D., McCallister, S. L. and Smith, R. A.: Net ecosystem production and organic carbon balance of U.S. East Coast estuaries: A synthesis approach, *Glob. Biogeochem. Cycles*, 29(1), 96–111, doi:10.1002/2013GB004736, 2015.
- Hinde, R. and Smith, D. C.: Persistence of Functional Chloroplasts in *Elysia viridis* (Opisthobranchia, Sacoglossa), *Nature. New Biol.*, 239(88), 30–31, doi:10.1038/newbio239030a0, 1972.
- 460 Hohenegger, J., Piller, W. and Baal, C.: Reasons for spatial microdistributions of foraminifers in an intertidal pool (Northern Adriatic Sea), *Mar. Ecol.*, 10(1), 43–78, doi:10.1111/j.1439-0485.1989.tb00065.x, 1989.
- Jahnke, R. A.: Transport processes and organic matter cycling in coastal sediments, edited by A. R. Robinson and K. H. Brink, pp. 163–192., 2004.
- 465 Jauffrais, T., Jesus, B., Metzger, E., Mouget, J.-L., Jorissen, F. and Geslin, E.: Effect of light on photosynthetic efficiency of sequestered chloroplasts in intertidal benthic foraminifera (*Haynesina germanica* and *Ammonia tepida*), *Biogeosciences*, 13(9), 2715–2726, doi:10.5194/bg-13-2715-2016, 2016.
- Jorissen, F. J., Wittling, I., Peypouquet, J. P., Rabouille, C. and Relexans, J. C.: Live benthic foraminiferal faunas off Cape Blanc, NW-Africa: Community structure and microhabitats, *Deep Sea Res. Part Oceanogr. Res. Pap.*, 45(12), 2157–2188, doi:10.1016/S0967-0637(98)00056-9, 1998.
- 470 Kahler, P., Bjornsen, P. K., Lochte, K. and Antia, A.: Dissolved organic matter and its utilization by bacteria during spring in the Southern Ocean, *Deep-Sea Res. Part II-Top. Stud. Oceanogr.*, 44(1–2), 341–353, doi:10.1016/S0967-0645(96)00071-9, 1997.
- Langer, M. and Gehring, C.: Bacteria Farming - a Possible Feeding Strategy of Some Smaller, Motile Foraminifera, *J. Foraminifer. Res.*, 23(1), 40–46, doi:10.2113/gsjfr.23.1.40, 1993.
- 475 Lee, J. J. and Muller, W. A.: Trophic dynamics and niches of salt marsh foraminifera, *Am. Zool.*, 13(1), 215–223, doi:10.2307/3881901, 1973.
- Lee, J. J., McEnery, M., Pierce, S., Freudent.Hd and Muller, W. A.: Tracer experiments in feeding littoral foraminifera, *J. Protozool.*, 13(4), 659–670, doi:10.1111/j.1550-7408.1966.tb01978.x, 1966.
- 480 Lei, Y.-L., Stumm, K., Wickham, S. A. and Berninger, U.-G.: Distributions and biomass of benthic ciliates, foraminifera and amoeboid protists in marine, brackish, and freshwater sediments, *J. Eukaryot. Microbiol.*, 61(5), 493–508, doi:10.1111/jeu.12129, 2014.
- LeKieffre, C., Spangenberg, J. E., Mabilieu, G., Escrig, S., Meibom, A. and Geslin, E.: Surviving anoxia in marine sediments: The metabolic response of ubiquitous benthic foraminifera (*Ammonia tepida*), *PLOS ONE*, 12(5), e0177604, doi:10.1371/journal.pone.0177604, 2017.
- 485 LeKieffre, C., Jauffrais, T., Geslin, E., Jesus, B., Bernhard, J. M., Giovani, M.-E. and Meibom, A.: Inorganic carbon and nitrogen assimilation in cellular compartments of a benthic kleptoplastic foraminifer, *Sci. Rep.*, 8(1), 10140, doi:10.1038/s41598-018-28455-1, 2018.
- 490 Levandowsky, M., Cheng, T., Kehr, A., Kim, J., Gardner, L., Silvern, L., Tsang, L., Lai, G., Chung, C. and Prakash, E.: Chemosensory Responses to Amino-Acids and Certain Amines by the Ciliate *Tetrahymena* - a Flat Capillary Assay, *Biol. Bull.*, 167(2), 322–330, doi:10.2307/1541279, 1984.



- Linke, P.: Metabolic Adaptations of Deep-Sea Benthic Foraminifera to Seasonally Varying Food Input, *Mar. Ecol. Prog. Ser.*, 81(1), 51–63, doi:10.3354/meps081051, 1992.
- Linshy, V. N., Nigam, R. and Heinz, P.: Response of shallow water benthic foraminifera to a <sup>13</sup>C-labeled food pulse in the laboratory, in *Approaches to Study Living Foraminifera. Collection, Maintenance and Experimentation*, edited by H. Kitazato, J. M. Bernhard, U. Förstner, and W. Salomons, Springer, Japan., 2014.
- Lopez, E.: Algal chloroplasts in the protoplasm of 3 species of benthic foraminifera - taxonomic affinity, viability and persistence, *Mar. Biol.*, 53(3), 201–211, doi:10.1007/bf00952427, 1979.
- Marín, A. and Ros, J.: Ultrastructural and ecological aspects of the development of chloroplast retention in the sacoglossan gastropod *Elysia timida*, *J. Molluscan Stud.*, 59(1), 95–104, doi:10.1093/mollus/59.1.95, 1993.
- 500 Martins, M. V. A., Silva, F., Laut, L. L. M., Frontalini, F., Clemente, I. M. M. M., Miranda, P., Figueira, R., Sousa, S. H. M. and Dias, J. M. A.: Response of Benthic Foraminifera to Organic Matter Quantity and Quality and Bioavailable Concentrations of Metals in Aveiro Lagoon (Portugal), *PLoS ONE*, 10(2), doi:10.1371/journal.pone.0118077, 2015.
- Middelburg, J. J., Barranguet, C., Boschker, H. T. S., Herman, P. M. J., Moens, T. and Heip, C. H. R.: The fate of intertidal microphytobenthos carbon: An in situ <sup>13</sup>C-labeling study, *Limnol. Oceanogr.*, 45(6), 1224–1234, 2000.
- 505 Mojtahid, M., Geslin, E., Coynel, A., Gorse, L., Vella, C., Davranche, A., Zozzolo, L., Blanchet, L., Bénéteau, E. and Maillet, G.: Spatial distribution of living (Rose Bengal stained) benthic foraminifera in the Loire estuary (western France), *J. Sea Res.*, 118, 1–16, doi:10.1016/j.seares.2016.02.003, 2016.
- Moodley, L., Boschker, H. T. S., Middelburg, J. J., Pel, R., Herman, P. M. J., de Deckere, E. and Heip, C. H. R.: Ecological significance of benthic foraminifera: <sup>13</sup>C labelling experiments, *Mar. Ecol. Prog. Ser.*, 202, 289–295, doi:10.3354/meps202289, 2000.
- 510 Muller, W. A. and Lee, J. J.: Apparent indispensability of bacteria in foraminiferan nutrition, *J. Protozool.*, 16(3), 471–478, doi:10.1111/j.1550-7408.1969.tb02303.x, 1969.
- Murray, J. W.: Ecological experiments on Foraminifera, *J. Mar. Biol. Assoc. UK*, 43(3), 621–642, doi:10.1017/S0025315400025571, 1963.
- 515 Murray, J. W. and Alve, E.: Major aspects of foraminiferal variability (standing crop and biomass) on a monthly scale in an intertidal zone, *J. Foraminifer. Res.*, 30(3), 177–191, doi:10.2113/0300177, 2000.
- Nomaki, H., Heinz, P., Hemleben, C. and Kitazato, H.: Behavior and response of deep-sea benthic foraminifera to freshly supplied organic matter: A laboratory feeding experiment in microcosm environments, *J. Foraminifer. Res.*, 35(2), 103–113, doi:10.2113/35.2.103, 2005a.
- 520 Nomaki, H., Heinz, P., Nakatsuka, T., Shimanaga, M. and Kitazato, H.: Species-specific ingestion of organic carbon by deep-sea benthic foraminifera and meiobenthos: In situ tracer experiments, *Limnol. Oceanogr.*, 50(1), 134–146, 2005b.
- Nomaki, H., Heinz, P., Nakatsuka, T., Shimanaga, M., Ohkouchi, N., Ogawa, N. O., Kogure, K., Ikemoto, E. and Kitazato, H.: Different ingestion patterns of <sup>13</sup>C-labeled bacteria and algae by deep-sea benthic foraminifera, *Mar. Ecol. Prog. Ser.*, 310, 95–108, doi:10.3354/meps310095, 2006.

- 525 Nomaki, H., Ohkouchi, N., Heinz, P., Suga, H., Chikaraishi, Y., Ogawa, N. O., Matsumoto, K. and Kitazato, H.: Degradation of algal lipids by deep-sea benthic foraminifera: An in situ tracer experiment, *Deep-Sea Res. Part -Oceanogr. Res. Pap.*, 56(9), 1488–1503, doi:10.1016/j.dsr.2009.04.013, 2009.
- Nomaki, H., Ogawa, N. O., Takano, Y., Suga, H., Ohkouchi, N. and Kitazato, H.: Differing utilization of glucose and algal particulate organic matter by deep-sea benthic organisms of Sagami Bay, Japan, *Mar. Ecol. Prog. Ser.*, 431, 11–24, doi:10.3354/meps09144, 2011.
- 530 van Oevelen, D., Middelburg, J. J., Soetaert, K. and Moodley, L.: The fate of bacterial carbon in an intertidal sediment: Modeling an in situ isotope tracer experiment, *Limnol. Oceanogr.*, 51(3), 1302–1314, doi:10.4319/lo.2006.51.3.1302, 2006a.
- van Oevelen, D., Moodley, L., Soetaert, K. and Middelburg, J. J.: The trophic significance of bacterial carbon in a marine intertidal sediment: Results of an in situ stable isotope labeling study, *Limnol. Oceanogr.*, 51(5), 2349–2359, 2006b.
- 535 Ota, T. and Taniguchi, A.: Standing crop of planktonic ciliates in the East China Sea and their potential grazing impact and contribution to nutrient regeneration, *Deep-Sea Res. Part II-Top. Stud. Oceanogr.*, 50(2), 423–442, doi:10.1016/S0967-0645(02)00461-7, 2003.
- Papaspyrou, S., Diz, P., Garcia-Robledo, E., Corzo, A. and Jimenez-Arias, J.-L.: Benthic foraminiferal community changes and their relationship to environmental dynamics in intertidal muddy sediments (Bay of Cadiz, SW Spain), *Mar. Ecol. Prog. Ser.*, 490, 121–135, doi:10.3354/meps10447, 2013.
- 540 Pascal, P.-Y., Dupuy, C., Richard, P. and Niquil, N.: Bacterivory in the common foraminifer *Ammonia tepida*: Isotope tracer experiment and the controlling factors, *J. Exp. Mar. Biol. Ecol.*, 359(1), 55–61, doi:http://dx.doi.org/10.1016/j.jembe.2008.02.018, 2008.
- Pillet, L., de Vargas, C. and Pawlowski, J.: Molecular Identification of Sequestered Diatom Chloroplasts and Kleptoplastidy in Foraminifera, *Protist*, 162(3), 394–404, doi:10.1016/j.protis.2010.10.001, 2011.
- 545 Raven, J. A., Walker, D. I., Jensen, K. R., Handley, L. L., Scrimgeour, C. M. and McInroy, S. G.: What fraction of the organic carbon in sacoglossans is obtained from photosynthesis by kleptoplastids? An investigation using the natural abundance of stable carbon isotopes, *Mar. Biol.*, 138(3), 537–545, doi:10.1007/s002270000488, 2001.
- Regnier, P., Friedlingstein, P., Ciais, P., Mackenzie, F. T., Gruber, N., Janssens, I. A., Laruelle, G. G., Lauerwald, R., Luyssaert, S., Andersson, A. J., Arndt, S., Arnosti, C., Borges, A. V., Dale, A. W., Gallego-Sala, A., Godd ris, Y., Goossens, N., Hartmann, J., Heinze, C., Ilyina, T., Joos, F., LaRowe, D. E., Leifeld, J., Meysman, F. J. R., Munhoven, G., Raymond, P. A., Spahni, R., Suntharalingam, P. and Thullner, M.: Anthropogenic perturbation of the carbon fluxes from land to ocean, *Nat. Geosci.*, 6(8), 597–607, doi:10.1038/ngeo1830, 2013.
- 550 Saad, S. A. and Wade, C. M.: Seasonal and Spatial Variations of Saltmarsh Benthic Foraminiferal Communities from North Norfolk, England, *Microb. Ecol.*, 73(3), 539–555, doi:10.1007/s00248-016-0895-5, 2017.
- Sivasubramanian, V. and Rao, V. N. R.: Uptake and assimilation of nitrogen by marine diatoms—I. Kinetics of nitrogen uptake, *Proc. Plant Sci.*, 98(2), 71–88, doi:10.1007/BF03053393, 1988.
- Smith, S. V. and Hollibaugh, J. T.: Coastal metabolism and the oceanic organic carbon balance, *Rev. Geophys.*, 31(1), 75–89, doi:10.1029/92RG02584, 1993.
- 560 Snyder, R. A. and Hoch, M. P.: Consequences of protist-stimulated bacterial production for estimating protist growth efficiencies, *Hydrobiologia*, 341(2), 113–123, doi:10.1007/BF00018115, 1996.

- Teugels, B., Bouillon, S., Veuger, B., Middelburg, J. J. and Koedam, N.: Kleptoplasts mediate nitrogen acquisition in the sea slug *Elysia viridis*, *Aquat. Biol.*, 4(1), 15–21, doi:10.3354/ab00092, 2008.
- 565 Tillmann, U., Hesse, K.-J. and Colijn, F.: Planktonic primary production in the German Wadden Sea, *J. Plankton Res.*, 22(7), 1253–1276, doi:10.1093/plankt/22.7.1253, 2000.
- Trench, R. K.: Chloroplasts as Functional Endosymbionts in the Mollusc *Tridachia crispata* (Bérgh), (Opisthobranchia, Sacoglossa), *Nature*, 222(5198), 1071–1072, doi:10.1038/2221071a0, 1969.
- Valdés, V., Fernandez, C., Molina, V. and Escribano, R.: Nitrogen excretion by copepods and its effect on ammonia-oxidizing communities from a coastal upwelling zone, *Limnol. Oceanogr.*, 63(1), 278–294, doi:10.1002/lno.10629, 2018.
- 570 Verity, P. G., Robertson, C. Y., Tronzo, C. R., Andrews, M. G., Nelson, J. R. and Sieracki, M. E.: Relationships between cell volume and the carbon and nitrogen content of marine photosynthetic nanoplankton, *Limnol. Oceanogr.*, 37(7), 1434–1446, doi:10.4319/lo.1992.37.7.1434, 1992.
- 575 Ward, J. N., Pond, D. W. and Murray, J. W.: Feeding of benthic foraminifera on diatoms and sewage-derived organic matter: an experimental application of lipid biomarker techniques, *Mar. Environ. Res.*, 56(4), 515–530, doi:10.1016/S0141-1136(03)00040-0, 2003.
- Wheeler, P. A. and Kirchman, D. L.: Utilization of inorganic and organic nitrogen by bacteria in marine systems<sup>1</sup>, *Limnol. Oceanogr.*, 31(5), 998–1009, doi:10.4319/lo.1986.31.5.0998, 1986.
- 580 Wukovits, J., Enge, A. J., Wanek, W., Watzka, M. and Heinz, P.: Increased temperature causes different carbon and nitrogen processing patterns in two common intertidal foraminifera (*Ammonia tepida* and *Haynesina germanica*), *Biogeosciences*, 14(11), 2815–2829, doi:10.5194/bg-14-2815-2017, 2017.
- Wukovits, J., Bukenberger, P., Enge, A. J., Gerg, M., Wanek, W., Watzka, M. and Heinz, P.: Food supply and size class depending variations in phytodetritus intake in the benthic foraminifer *Ammonia tepida*, *Biol. Open*, bio.030056, doi:10.1242/bio.030056, 2018.
- 585 Zweifel, U., Norrman, B. and Hagstrom, A.: Consumption of Dissolved Organic-Carbon by Marine-Bacteria and Demand for Inorganic Nutrients, *Mar. Ecol. Prog. Ser.*, 101(1–2), 23–32, doi:10.3354/meps101023, 1993.

**Table 1. Experimental setup and conditions**

|        | species             | Individuals per replicate | Sampling intervals [h]   | T [°C]     | food source          | amount of food added [mg C m <sup>-2</sup> ] | amount of food added [mg N m <sup>-2</sup> ] |
|--------|---------------------|---------------------------|--------------------------|------------|----------------------|----------------------------------------------|----------------------------------------------|
| Exp. 1 | <i>A. tepida</i>    | 50 - 55                   | 24 / fed<br>24 / starved | 15, 20, 25 | Diatom               | 540                                          | 100                                          |
|        | <i>H. germanica</i> | 50 - 55                   | 24 / fed<br>24 / starved | 15, 20, 25 | Diatom               | 540                                          | 100                                          |
| Exp. 2 | <i>A. tepida</i>    | 55                        | 1, 3, 6, 12, 24          | 20         | Chlorophyte          | 410                                          | 71                                           |
|        | <i>A. tepida</i>    | 55                        | 1, 3, 6, 12, 24          | 20         | Diatom               | 647                                          | 21                                           |
|        | <i>A. tepida</i>    | 55                        | 1, 3, 6, 12, 24          | 20         | Chlorophyte + Diatom | 206 + 324                                    | 35 + 10                                      |

590

**Table 2. Michaelis Menten parameters of curves for pC and pN intake in Figure 4 (bold font = data from measured values, regular font = data from calculated values, Vmax = maximum pC/pN; Km = half saturation for pC/pN, Res. SE = residual standard error, DF = degrees of freedom).**

|    |                               | Vmax           | Km           | Res. SE       | DF        |
|----|-------------------------------|----------------|--------------|---------------|-----------|
| pC | <b>Chlorophyte mono diet</b>  | <b>179.875</b> | <b>0.611</b> | <b>20.745</b> | <b>16</b> |
|    | <b>Chlorophyte mixed diet</b> | <b>124.196</b> | <b>1.359</b> | <b>11.918</b> | <b>15</b> |
|    | Diatom mono diet              | 80.191         | 1.374        | 9.290         | 16        |
|    | Diatom mixed diet             | 24.000         | 0.098        | 2.983         | 16        |
| pN | Chlorophyte mono diet         | 30.860         | 0.611        | 3.559         | 16        |
|    | Chlorophyte mixed diet        | 21.307         | 1.359        | 2.286         | 12        |
|    | <b>Diatom mono diet</b>       | <b>10.912</b>  | <b>1.374</b> | <b>1.264</b>  | <b>12</b> |
|    | <b>Diatom mixed diet</b>      | <b>3.267</b>   | <b>0.100</b> | <b>0.410</b>  | <b>16</b> |

595

**Table 3. Mean abundances (± SD) of live *A. tepida* and *H. germanica* (0-1 cm sediment depth), TOC, TN, and carbon and nitrogen flux calculated from sediment cores (early May 2015\* n = 1, late April 2016 n = 3). Data for 15°C of Experiment 1 were used to estimate carbon and nitrogen fluxes (n.d. = not determined).**

|                   | size fraction [µm] | abundance [ind m <sup>-2</sup> ] | TOC [mg m <sup>-2</sup> ] | TN [mg m <sup>-2</sup> ] | pC <sub>intake</sub> [mg C m <sup>-2</sup> d <sup>-1</sup> ] | pC <sub>release</sub> [mg C m <sup>-2</sup> d <sup>-1</sup> ] | pN <sub>intake</sub> [mg N m <sup>-2</sup> d <sup>-1</sup> ] | pN <sub>release</sub> [mg N m <sup>-2</sup> d <sup>-1</sup> ] |
|-------------------|--------------------|----------------------------------|---------------------------|--------------------------|--------------------------------------------------------------|---------------------------------------------------------------|--------------------------------------------------------------|---------------------------------------------------------------|
| <i>A. tepida</i>  | 125 - 250          | 1166979                          | 226.516                   | 77.322                   | 20.937                                                       | 8.375                                                         | 5.333                                                        | 1.813                                                         |
| 2015 <sub>1</sub> | 250 - 355          | 186742                           | 163.428                   | 35.817                   | 11.467                                                       | 4.480                                                         | 1.919                                                        | 0.651                                                         |

|                     |           |                        |        |       |       |       |       |       |
|---------------------|-----------|------------------------|--------|-------|-------|-------|-------|-------|
|                     | >355      | 3773                   | n.d.   | n.d.  | n.d.  | n.d.  | n.d.  | n.d.  |
| <i>A. tepida</i>    | 125 - 250 | 97248 ( $\pm 10471$ )  | 21.317 | 7.277 | 1.745 | 0.698 | 0.444 | 0.151 |
| 2016                | 250 - 355 | 43594 ( $\pm 11041$ )  | 38.152 | 8.361 | 1.802 | 0.704 | 0.302 | 0.102 |
|                     | >355      | 4401 ( $\pm 12786$ )   | n.d.   | n.d.  | n.d.  | n.d.  | n.d.  | n.d.  |
| <i>H. germanica</i> | 125 - 250 | 109823 ( $\pm 54078$ ) | 25.717 | 6.867 | n.d.  | n.d.  | n.d.  | n.d.  |
| 2016                | 250 - 355 | 29342 ( $\pm 12768$ )  | 30.978 | 5.311 | 0.601 | 0.188 | 0.069 | 0.028 |
|                     | >355      | 3773 ( $\pm 2741$ )    | n.d.   | n.d.  | n.d.  | n.d.  | n.d.  | n.d.  |

600 1 Data from Wukovits et al. (2018)

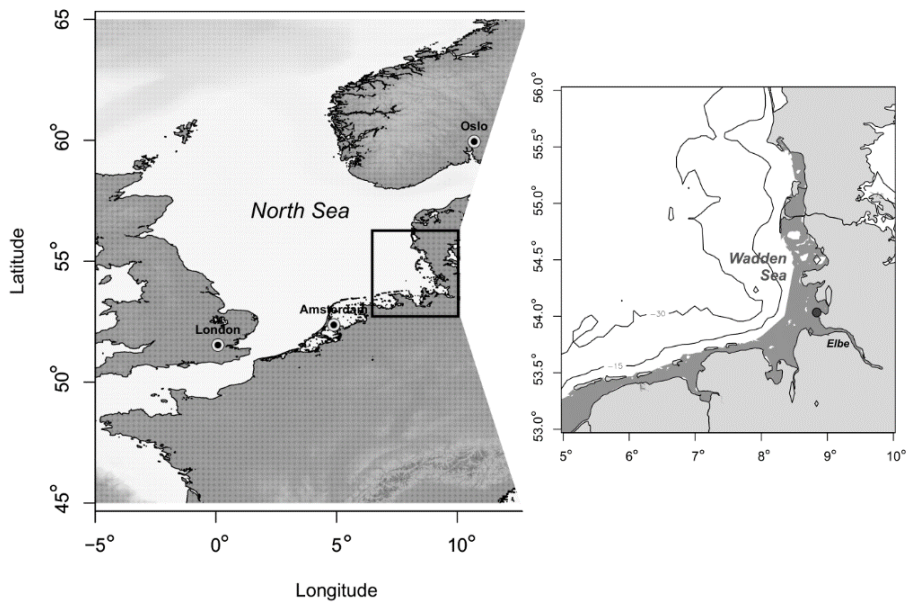

Figure 1. Sampling area.

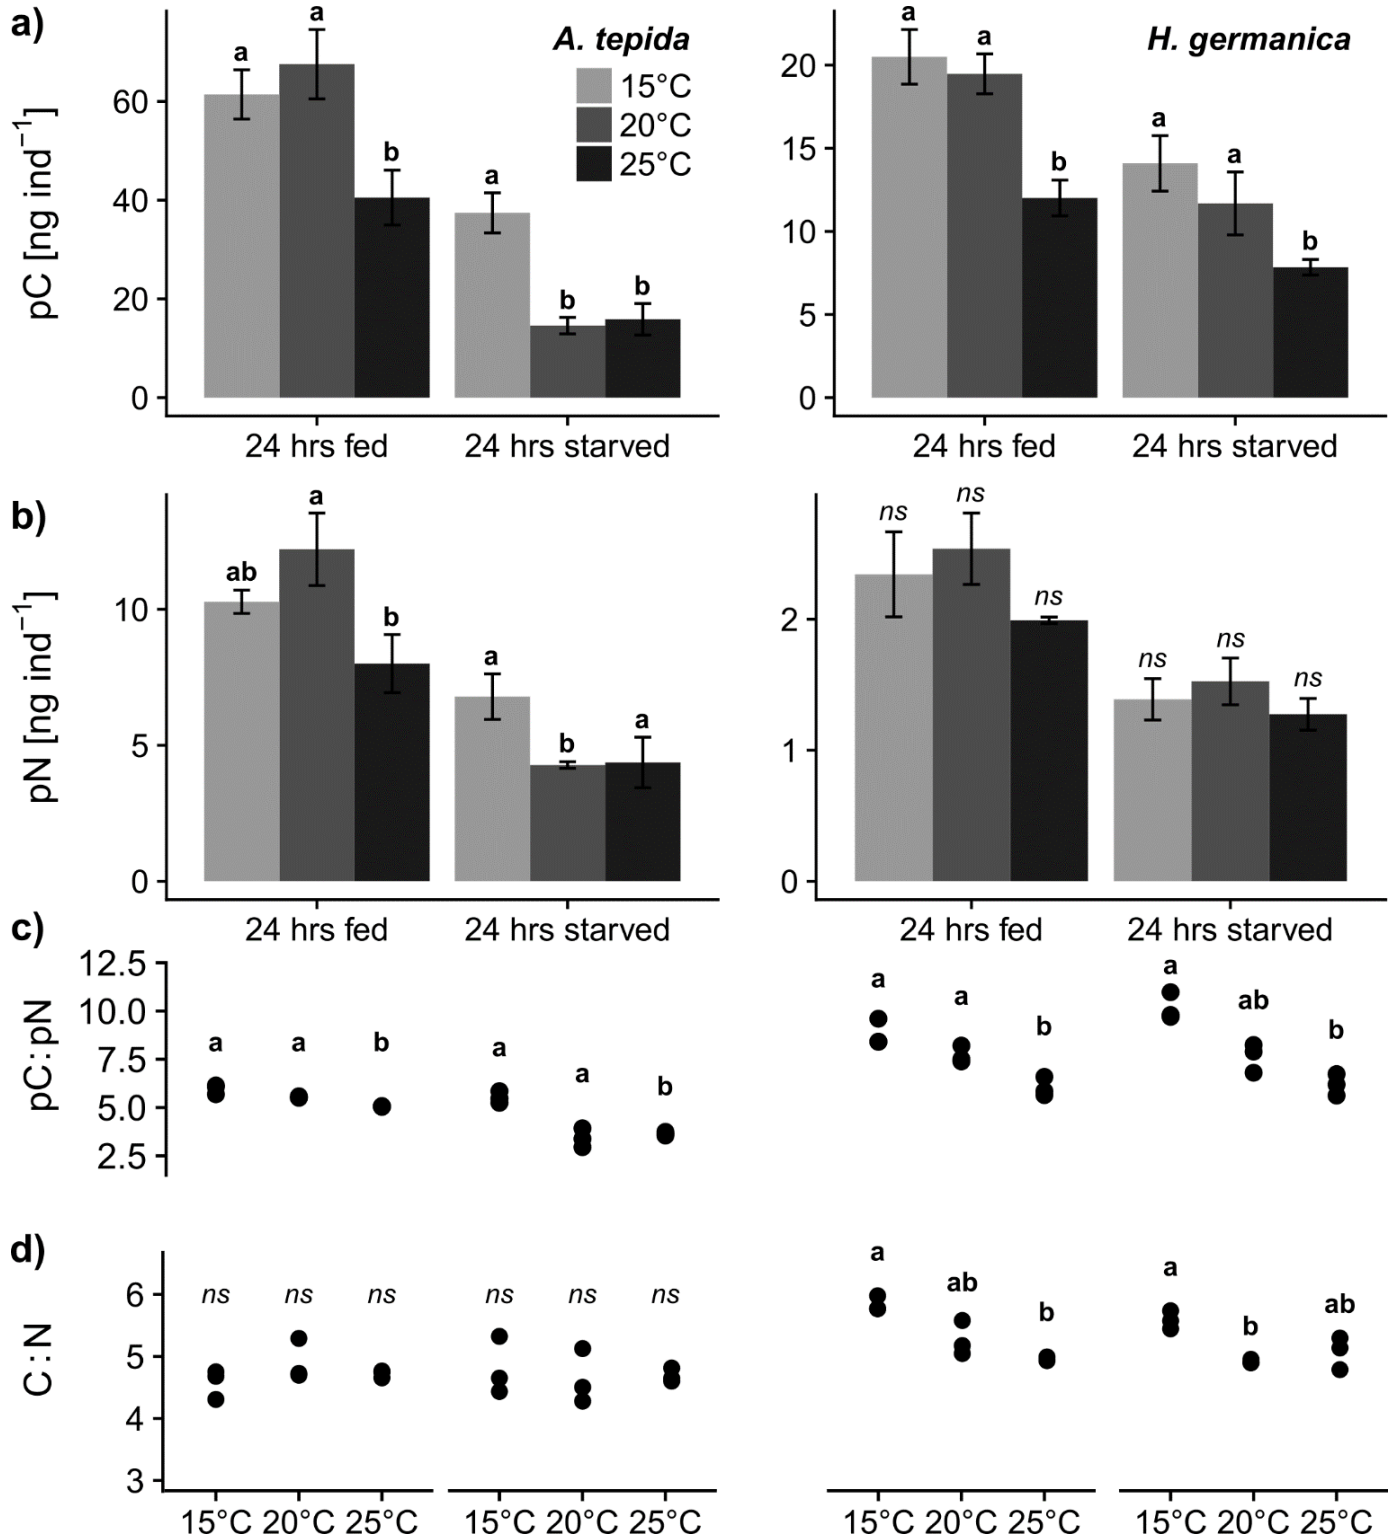

Figure 1 a – d). Comparison of pC and pN from diatom feeding in *A. tepida* and *H. germanica* after a 24 hours feeding period (24 hrs fed) and 24 hours without food (24 hrs starved) at 15°C, 20°C, and 25°C. Letters show significant differences of a) cytoplasmic

610

pC; b) pN between incubation temperatures within the 24 hours feeding period/24 hrs fed and the 24 hours incubation without food/24 hrs starved; c) pC : pN ratio (n=3, in all cases); d) ratios of foraminiferal cytoplasmic C:N ratios;  $p < 0.05$ , pairwise permutation tests, *ns* = not significant

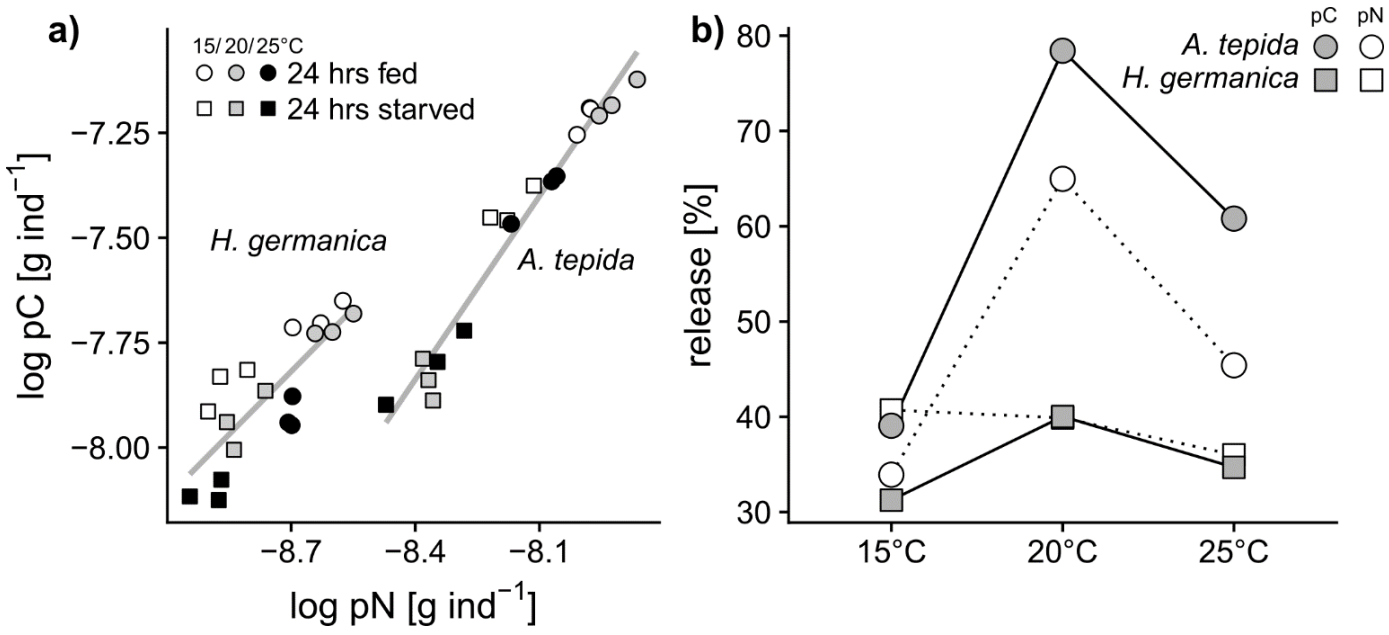

Figure 2 a-b. a) Relationship of pC and pN in *A. tepida* and *H. germanica* (*A. tepida*:  $R^2 = 0.96$ ,  $y = 1.5x + 4.4$ ,  $p < 0.01$ ; *H. germanica*:  $R^2 = 0.64$ ,  $y = x + 0.88$ ,  $p = 0.011$ ), and b) phytodetrital carbon and nitrogen turnover as percent release (of total intake of pC or pN per day, respectively).

615

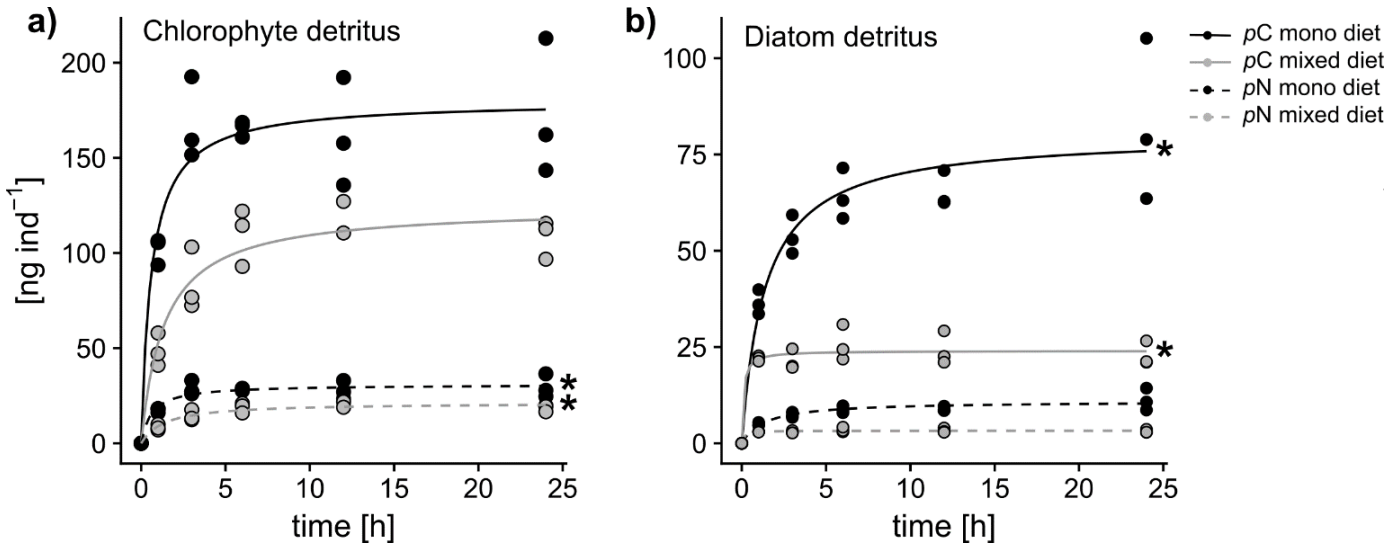

Figure 3 a-b. Comparison of chlorophyte and diatom phyto-detritus feeding in *A. tepida* for 24 hours, presenting feeding dynamics for a) chlorophyte detritus and b) diatom detritus. Curves show Michaelis Menten Fits through triplicates for each approach (stars indicate calculated values for pC or pN).

620





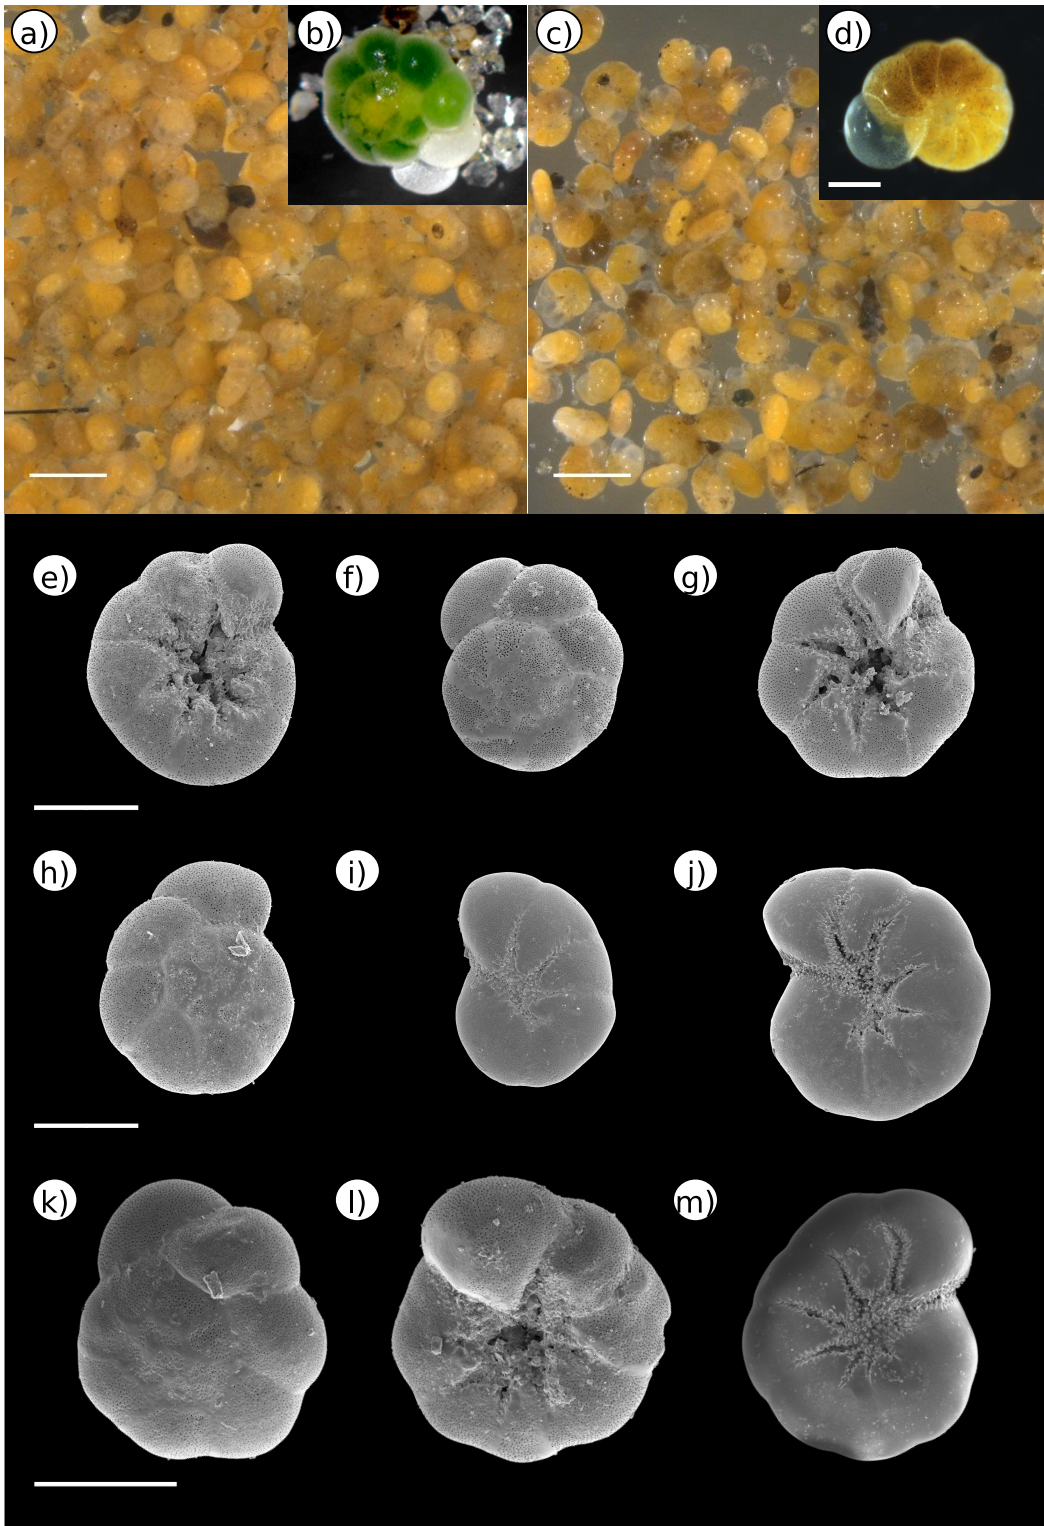

Supplementary Figure 1. a) Light microscope image of fresh picked *A. tepida* specimens (scale bar = 500  $\mu\text{m}$ ). b) *A. tepida* after feeding on fresh microalgae. c) Fresh picked *H. germanica* specimens (scale bar = 500  $\mu\text{m}$ ). d) *H. germanica* individual (scale bar = 200  $\mu\text{m}$ ). e-h) SEM images of *A. tepida* collected in 2014 at the sampling location of this study (scale bar = 200  $\mu\text{m}$ ). i-j) *H. germanica* collected in 2014 at the sampling location of this study (scale bar = 200  $\mu\text{m}$ ). k-l) *A. tepida* collected in 2016 at the sampling location of this study (scale bar = 200  $\mu\text{m}$ ). m) *H. germanica* collected in 2016 at the sampling location of this study (scale bar = 200  $\mu\text{m}$ ).

Table S1. Raw data of EA-IRMA of foraminiferal samples of Paper 4 (n.a. = natural abundance, data for 5.5 P from Paper 3).

|                          | d 15N/14N | AT% 15N/14N | d 13C/12C | AT% 13C/12C |  |  |  |  |  |  |  |
|--------------------------|-----------|-------------|-----------|-------------|--|--|--|--|--|--|--|
| <i>H. germanica</i> n.a. | 12.58     | 0.371       | -13.56    | 1.091       |  |  |  |  |  |  |  |
| 5.7 D                    | 45528.61  | 14.613      | 1153.00   | 2.351       |  |  |  |  |  |  |  |
| 7.1 D                    | 216695.58 | 44.464      | 10361.59  | 11.271      |  |  |  |  |  |  |  |
| 5.5 P                    | 32011.61  | 15.824      | 1627.25   | 4.389       |  |  |  |  |  |  |  |

  

| food source | T    | treatment      | Nr/Ind | weight [mg] | d 15N/14N | AT% 15N/14N | d 13C/12C | AT% 13C/12C | µg N  | µg C  |
|-------------|------|----------------|--------|-------------|-----------|-------------|-----------|-------------|-------|-------|
| 5.7 D       | 15°C | 24 hrs fed     | 48     | 1.250       | 425.11    | 0.521       | 3.82      | 1.110       | 8.85  | 51.58 |
| 5.7 D       | 15°C | 24 hrs fed     | 52     | 1.277       | 416.26    | 0.518       | 3.25      | 1.109       | 8.79  | 52.80 |
| 5.7 D       | 15°C | 24 hrs fed     | 53     | 1.289       | -         | -           | -         | -           | -     | -     |
| 5.7 D       | 20°C | 24 hrs fed     | 50     | 0.963       | 328.42    | 0.486       | -0.42     | 1.105       | 7.75  | 43.83 |
| 5.7 D       | 20°C | 24 hrs fed     | 53     | 1.284       | 323.13    | 0.484       | -0.54     | 1.105       | 8.61  | 51.50 |
| 5.7 D       | 20°C | 24 hrs fed     | 56     | 1.353       | 335.27    | 0.489       | 0.39      | 1.106       | 8.74  | 52.34 |
| 5.7 D       | 25°C | 24 hrs fed     | 48     | 0.972       | 257.92    | 0.461       | -2.90     | 1.102       | 8.85  | 49.25 |
| 5.7 D       | 25°C | 24 hrs fed     | 54     | 1.301       | 291.73    | 0.473       | -3.30     | 1.102       | 9.19  | 53.82 |
| 5.7 D       | 25°C | 24 hrs fed     | 50     | 1.176       | 385.61    | 0.507       | 2.53      | 1.108       | 7.89  | 45.38 |
| 5.7 D       | 15°C | 24 hrs starved | 49     | 1.052       | 230.04    | 0.450       | -4.70     | 1.101       | 7.58  | 42.71 |
| 5.7 D       | 15°C | 24 hrs starved | 61     | -           | -         | -           | -         | -           | -     | -     |
| 5.7 D       | 15°C | 24 hrs starved | 53     | 1.192       | 211.71    | 0.444       | -5.63     | 1.099       | 8.70  | 51.81 |
| 5.7 D       | 20°C | 24 hrs starved | 48     | 1.108       | 241.56    | 0.455       | -5.04     | 1.100       | 7.44  | 41.11 |
| 5.7 D       | 20°C | 24 hrs starved | 45     | 1.099       | 254.99    | 0.459       | -5.81     | 1.099       | 7.96  | 43.16 |
| 5.7 D       | 20°C | 24 hrs starved | 44     | 1.202       | 234.45    | 0.452       | -6.98     | 1.098       | 7.39  | 42.01 |
| 5.7 D       | 25°C | 24 hrs starved | 49     | 1.217       | 337.63    | 0.490       | -3.98     | 1.101       | 7.70  | 39.16 |
| 5.7 D       | 25°C | 24 hrs starved | 39     | 1.057       | 321.86    | 0.484       | -4.15     | 1.101       | 7.18  | 40.77 |
| 5.7 D       | 25°C | 24 hrs starved | 43     | 1.235       | 374.66    | 0.503       | -2.93     | 1.102       | 6.66  | 36.67 |
| 7.1 D       | 15°C | 24 hrs fed     | 55     | 1.411       | 496.43    | 0.547       | 35.23     | 1.144       | 9.48  | 55.00 |
| 7.1 D       | 15°C | 24 hrs fed     | 52     | 1.158       | 619.09    | 0.592       | 50.35     | 1.161       | 9.60  | 57.15 |
| 7.1 D       | 15°C | 24 hrs fed     | 53     | 1.417       | 481.34    | 0.542       | 41.18     | 1.151       | 8.80  | 51.30 |
| 7.1 D       | 20°C | 24 hrs fed     | 49     | 1.373       | 1004.73   | 0.732       | 94.37     | 1.209       | 9.01  | 50.38 |
| 7.1 D       | 20°C | 24 hrs fed     | 50     | 0.907       | 1148.04   | 0.784       | 113.35    | 1.229       | 7.48  | 42.49 |
| 7.1 D       | 20°C | 24 hrs fed     | 49     | 1.413       | 1017.81   | 0.737       | 108.25    | 1.224       | 9.49  | 54.69 |
| 7.1 D       | 25°C | 24 hrs fed     | 51     | 1.243       | 853.93    | 0.677       | 80.93     | 1.194       | 8.90  | 48.30 |
| 7.1 D       | 25°C | 24 hrs fed     | 48     | 1.195       | 934.13    | 0.706       | 83.27     | 1.197       | 7.60  | 43.78 |
| 7.1 D       | 25°C | 24 hrs fed     | 53     | 1.243       | 764.11    | 0.645       | 65.33     | 1.177       | 8.23  | 46.30 |
| 7.1 D       | 15°C | 24 hrs starved | 50     | 1.128       | 432.69    | 0.524       | 12.73     | 1.120       | 7.28  | 40.52 |
| 7.1 D       | 15°C | 24 hrs starved | 46     | 1.166       | 465.91    | 0.536       | 16.65     | 1.124       | 7.27  | 43.98 |
| 7.1 D       | 15°C | 24 hrs starved | 59     | 1.251       | 416.39    | 0.518       | 15.44     | 1.123       | 8.80  | 51.35 |
| 7.1 D       | 20°C | 24 hrs starved | 49     | 1.160       | 555.79    | 0.569       | 23.69     | 1.132       | 7.88  | 44.51 |
| 7.1 D       | 20°C | 24 hrs starved | 48     | 1.209       | 715.38    | 0.627       | 35.48     | 1.144       | 7.74  | 42.10 |
| 7.1 D       | 20°C | 24 hrs starved | 50     | 1.280       | 771.33    | 0.647       | 34.82     | 1.144       | 8.32  | 45.05 |
| 7.1 D       | 25°C | 24 hrs starved | 53     | 1.335       | 797.43    | 0.657       | 33.54     | 1.142       | 8.08  | 45.90 |
| 7.1 D       | 25°C | 24 hrs starved | 48     | 1.144       | 855.89    | 0.678       | 51.27     | 1.162       | 7.87  | 41.64 |
| 7.1 D       | 25°C | 24 hrs starved | 54     | 1.230       | 845.19    | 0.674       | 43.79     | 1.154       | 8.00  | 45.05 |
| 5.5 P       | 15°C | 24 hrs fed     | 50     | 1.469       | 541.16    | 0.564       | 64.97     | 1.177       | 8.27  | 49.43 |
| 5.5 P       | 15°C | 24 hrs fed     | 51     | 1.359       | 618.81    | 0.592       | 68.13     | 1.180       | 9.73  | 56.12 |
| 5.5 P       | 15°C | 24 hrs fed     | 51     | 1.398       | 559.13    | 0.570       | 60.14     | 1.171       | 9.53  | 54.99 |
| 5.5 P       | 20°C | 24 hrs fed     | 52     | 1.172       | 598.98    | 0.585       | 58.26     | 1.169       | 10.87 | 60.65 |
| 5.5 P       | 20°C | 24 hrs fed     | 52     | 1.363       | 576.87    | 0.577       | 62.15     | 1.174       | 10.05 | 52.00 |
| 5.5 P       | 20°C | 24 hrs fed     | 51     | 1.117       | 484.73    | 0.543       | 57.47     | 1.168       | 10.69 | 53.97 |
| 5.5 P       | 25°C | 24 hrs fed     | 47     | 1.012       | 439.52    | 0.527       | 32.98     | 1.142       | 9.38  | 46.52 |
| 5.5 P       | 25°C | 24 hrs fed     | 49     | 1.114       | 461.60    | 0.535       | 33.99     | 1.143       | 9.49  | 46.77 |
| 5.5 P       | 25°C | 24 hrs fed     | 49     | 1.127       | 403.72    | 0.514       | 34.21     | 1.143       | 10.93 | 54.56 |
| 5.5 P       | 15°C | 24 hrs starved | 48     | 1.246       | 364.87    | 0.500       | 44.50     | 1.154       | 7.43  | 40.48 |
| 5.5 P       | 15°C | 24 hrs starved | 52     | 1.531       | 397.28    | 0.511       | 47.21     | 1.157       | 9.18  | 52.64 |
| 5.5 P       | 15°C | 24 hrs starved | 53     | 1.508       | 351.37    | 0.495       | 48.17     | 1.158       | 9.13  | 50.88 |
| 5.5 P       | 20°C | 24 hrs starved | 51     | 1.098       | 395.17    | 0.511       | 43.51     | 1.153       | 10.00 | 49.00 |
| 5.5 P       | 20°C | 24 hrs starved | 54     | 1.019       | 365.61    | 0.500       | 40.76     | 1.150       | 9.27  | 45.91 |
| 5.5 P       | 20°C | 24 hrs starved | 55     | 1.322       | 362.58    | 0.499       | 31.43     | 1.140       | 9.90  | 48.50 |
| 5.5 P       | 25°C | 24 hrs starved | 54     | 1.046       | 289.12    | 0.472       | 18.97     | 1.126       | 9.62  | 50.96 |
| 5.5 P       | 25°C | 24 hrs starved | 39     | 0.952       | 333.26    | 0.488       | 22.21     | 1.130       | 7.14  | 36.69 |
| 5.5 P       | 25°C | 24 hrs starved | 57     | 1.327       | 313.36    | 0.481       | 19.12     | 1.127       | 10.97 | 52.50 |

Table S2. Raw data of GC-IRMS of water samples.

|                                     | food source | T    | avg d13C/12C | avg AT% 13C/12C | ppm CO2 |
|-------------------------------------|-------------|------|--------------|-----------------|---------|
| H <sub>3</sub> PO <sub>4</sub>      | -           | -    | -18.734      | 1.0852          | 83.85   |
| H <sub>3</sub> PO <sub>4</sub> + SW | -           | -    | -1.537       | 1.1040          | 9162.91 |
|                                     | 5.7 D       | 15°C | -1.135       | 1.1044          | 9398.27 |
|                                     | 5.7 D       | 15°C | -1.250       | 1.1043          | 8406.95 |
|                                     | 5.7 D       | 15°C | -1.156       | 1.1044          | 9883.24 |
|                                     | 5.7 D       | 20°C | -0.870       | 1.1047          | 9184.63 |
|                                     | 5.7 D       | 20°C | -1.162       | 1.1044          | 7778.55 |
|                                     | 5.7 D       | 20°C | -0.994       | 1.1046          | 8489.17 |
|                                     | 5.7 D       | 25°C | -0.963       | 1.1046          | 8829.57 |
|                                     | 5.7 D       | 25°C | -1.047       | 1.1045          | 9614.38 |
|                                     | 7.1 D       | 15°C | -0.887       | 1.1047          | 9472.19 |
|                                     | 7.1 D       | 15°C | -0.756       | 1.1048          | 9247.92 |
|                                     | 7.1 D       | 15°C | -1.060       | 1.1045          | 9794.93 |
|                                     | 7.1 D       | 20°C | -0.941       | 1.1046          | 6902.25 |
|                                     | 7.1 D       | 20°C | -0.762       | 1.1048          | 7843.66 |
|                                     | 7.1 D       | 20°C | -0.910       | 1.1047          | 7959.04 |
|                                     | 7.1 D       | 25°C | -0.306       | 1.1053          | 7818.50 |
|                                     | 7.1 D       | 25°C | -0.465       | 1.1052          | 9206.42 |
|                                     | 5.7 P       | 15°C | -0.861       | 1.1047          | 7659.74 |
|                                     | 5.7 P       | 15°C | -0.971       | 1.1046          | 9208.57 |
|                                     | 5.7 P       | 15°C | -0.655       | 1.1049          | 9055.14 |
|                                     | 5.7 P       | 20°C | -0.536       | 1.1051          | 9910.84 |
|                                     | 5.7 P       | 20°C | -0.538       | 1.1051          | 8473.16 |
|                                     | 5.7 P       | 20°C | -0.691       | 1.1049          | 9219.05 |
|                                     | 5.7 P       | 25°C | -0.351       | 1.1053          | 7268.07 |
|                                     | 5.7 P       | 25°C | -0.664       | 1.1049          | 7246.05 |
| He                                  |             |      |              |                 | 0       |

## Response to Referee 1:

### **Major comments**

#### Introduction

R1: Introduction. I think that the manuscript would benefit from a greater overview of: 1) the carbon and nitrogen cycles in coastal environments 2) the role of benthic foraminifera in the carbon and nitrogen cycles. Some information are provided in the Discussion section of the Manuscript. However, I think that a general overview of these porcesses should be included in the Introduction, as well.

JW: The introduction was extended, providing the following information about coastal carbon and nitrogen cycles and the role of foraminifera in these cycles:

Line 26-43: "Oceanic and terrestrial systems are connected by the carbon cycling in coastal waters, which contribute to a major part of the global carbon cycles and budgets (Bauer et al., 2013; Cai, 2011; Cole et al., 2007; Regnier et al., 2013). Estuaries are an important source for organic matter in coastal systems and were estimated to account for ~ 40% of oceanic phytoplankton primary productivity (Smith and Hollibaugh 1993). Most estuarine areas are considered to be net heterotrophic, or act as carbon sinks, respectively (e.g. Caffrey, 2003, 2004; Cai, 2011; Herrmann et al., 2015). In general, 30% of overall coastal carbon is lost by metabolic oxidation (Smith and Hollibaugh 1993). Foraminifera are highly abundant in estuarine sediments and contribute strongly to these processes (Alve and Murray, 1994; Cesbron et al., 2016; Moodley et al., 2000; Murray and Alve, 2000). They feed on various sources of labile particulate OM, including microalgae and detritus, and provide a pivotal link in marine carbon cycles and food webs (Bradshaw, 1961; Goldstein and Corliss, 1994; Heinz et al., 2001; Lee et al., 1966; Lee and Muller, 1973; Nomaki et al., 2005b, 2006, 2009, 2011). The nitrogen compounds of OM particles are usually remineralized to ammonium (NH<sub>4</sub><sup>+</sup>). In this way, nitrogen gets again available as nutrient for primary productivity. A major part of this process is attributed to prokaryotic degraders, but protists are also involved in the process of regeneration of organic nitrogen compounds (Ferrier-Pages and Rassoulzadegan, 1994; Ota and Taniguchi, 2003; Verity et al., 1992). Due to their high abundances, we consider, that foraminifera contribute a large part to this OM reworking and the regeneration of carbon and nitrogen compounds from particulate OM sources, e.g. phytodetritus. In this study, we quantify the bulk OM-derived carbon and nitrogen release, which originates rather via excretion of organic carbon and nitrogen compounds (vesicular transport of metabolic waste products), respiration or diffusion of inorganic carbon and nitrogen by these single celled microorganisms."

R1: Line 49: The authors briefly mention previous studies on feeding preferences/strategy. Considering that these are important points that are discussed later in the manuscript, I suggest providing more information regarding past experimental studies. In doing so, the authors can better emphasize the novelty of their work in the context of earlier investigations.

JW: Added section:

Line 70-79: „Laboratory feeding experiments have shown, that *A. tepida* responds to several food sources, including different live microalgae (chlorophytes and diatoms) and chlorophyte

and diatom detritus (Bradshaw, 1961; Lee et al., 1966; LeKieffre et al., 2017; Linshy et al., 2014; Pascal et al., 2008; Wukovits et al., 2017, 2018). On the other hand, *H. germanica* shows a low affinity to chloroplast detritus food sources (Wukovits et al., 2017), but feeds actively on diatoms (Ward et al., 2003) and takes up inorganic, dissolved C & N compounds (LeKieffre et al., 2018). Both species are found in muddy coastal sediments containing high loads of nutrients or OM (Armynot du Chatelet et al., 2009; Armynot du Châtelet et al., 2004). But considering their different feeding strategies they might play distinct roles in the reworking of OM. Recent literature still lacks direct, quantitative comparisons of foraminiferal species-specific quantitative OM-derived C & N ingestion and release. Therefore, this study aims to compare and quantify variations in their respective uptake of OM (phytodetritus).

R1: Line 56. This work might be of interest to readers who might not be familiar with foraminifera. Thus, I recommend to better explaining what the authors mean by „release of OM derived carbon and nitrogen in foraminifera“ and how this connects with OM remineralization processes in coastal waters.

JW: The following sentence was added:

Line 41-43: „In this study, we quantify the bulk OM-derived C & N release, which originates rather via excretion of organic carbon and nitrogen compounds (vesicular transport of metabolic waste products), respiration or diffusion of inorganic C and N by the single celled micro-organisms.“

Additional changes in the introduction to better integrate the reviewers suggestions:

The following section was removed to keep the introduction concise:

“Certain key species in foraminiferal communities contribute with a major extant to the OM processing in extensive, highly productive marine environments (Enge et al., 2014, 2016, Moodley et al., 2000, 2002, Nomaki et al., 2005a, 2008; Witte et al., 2003; Wukovits et al., 2018). Therefore, the quantification of foraminiferal carbon and nitrogen processing derived from OM and food selectivity in foraminiferal communities, and the identification of key species in this process is essential to understand marine OM fluxes.”

Added sentence:

„In estuaries e.g. temperature acts in many cases as the most controlling factor on metabolic rates and hence on net ecosystem metabolism (Caffrey, 2003). Therefore, this factor was included in one of our observations concerning foraminiferal OM processing.“

## Materials and Methods

R1: I think that the authors should provide more information regarding their experimental design. For example, for Experiment 1, why did they choose to terminate the incubation after 24 hours? Is this enough time to obtain a significant result?

JW: The short experimental period was chosen due to the following considerations:

- To keep the effect of bacterial activity low. The foraminifera were cleaned before their transfer to the filtered incubation medium – but foraminiferal tests or cytoplasm always contain bacterial contaminations. Increased incubation time increases bacterial numbers and their contribution to the degradation of the algal material. Further, bacteria are incorporated together with the detrital diet.
- The foraminifera were incubated in 6 well plates containing a volume of 12 mL NSW. A shorter incubation time assures the stability of the system.
- To minimise potential stress due to laboratory cultivation in long-term incubations. A relatively high mortality was observed in earlier long term studies, specifically in *A. tepida* (Wukovits et al. 2017).
- The results in Wukovits 2017 (carried out on individuals sampled in the same area) further show, that time does not have a significant effect on the uptake of phytodetrital carbon in either of the two species after 2 days (in a time span of 2 - 14 days), suggesting that food intake and release equilibrates in a period prior to 2 days for these two intertidal species. Further, Moodley et al. (2000) observed a satiation of food intake in *A. tepida* within 50 hours after addition of phytodetritus in feeding experiments carried out on sediment cores.

The following sentences were added for clarity:

Line 137-138: „The experimental period of 24 hours was chosen to avoid potential bacterial activity and to maintain system stability.“

R1: Why chlorophyte was not tested in Experiment 1?

JW: There is already a study, testing the feeding behaviour of the two species with a chlorophyte food source at different temperatures (Wukovits et al. 2017). Therefore, we focused on the diatom food source in this study.

R1: Why *H. germanica* was not included in Experiment 2?

JW: The sediment collected for Experiment 2 contained mainly *A. tepida* individuals (most likely due to a reproductive event shortly before the sampling date). Unfortunately, *H. germanica* individuals were not available in sufficient abundances to carry out a parallel run with this species.

R1: Why was 20°C (and not 15°C or 25°C) the temperature tested in Experiment 2?

JW: Since *A. tepida* responses well to this temperature (Wukovits et al. 2018), 20°C was chosen. Temperatures in this range can further be measured in tide pools in the field in our sampling area in May/June.

The following sentence was added in the method description for Experiment 2:

Line 145 – 146: „ This experiment was carried out at 20°C, since *A. tepida* specimens collected in this area showed a good feeding response at this temperature (Wukovits et al., 2017).

R1: Line 88-90. How were these atom%<sup>s</sup> established?

JW: The atom%<sup>s</sup> of the final artificial phytodetritus were established by enriching the culture medium with aliquotes of NaH<sup>13</sup>CO<sub>3</sub> and Na<sup>15</sup>NO<sub>3</sub>.

The <sup>13</sup>C labelling in *D. tertiolecta* in Experiment 2 was rather high (this complicates the IRMS-analysis), therefore, the <sup>13</sup>C label addition was lowered for the production of the artificial phytodetritus in Experiment 1.

(Experiment 2 was originally planned and carried out earlier than Experiment 1 (but there was not enough *H. germanica* material available to carry out a parallel with this species). But switching the sequence in the manuscript appeared to be more concise – first focusing on the comparison of the two species (since they are both mentioned in the title) and then going into more detail on the feeding preferences of one of the two species.)

The following section was added for more clarity about the algae cultivation methods and the establishment of the product's atom%:

Line 117-123: „The algae culture medium for Experiment 1 (*P. tricornutum*) was produced with filtered NSW and enriched with 0.6 mM NaH<sup>13</sup>CO<sub>3</sub> and 0.9 mM NaNO<sub>3</sub> (Na<sup>14</sup>NO<sub>3</sub> : Na<sup>15</sup>NO<sub>3</sub> → 5.25 : 1), along with the stock solutions for the F/2 standard protocol. The culture medium for *D. tertiolecta* (<sup>13</sup>C single labeled) in Experiment 2 was produced with filtered NSW, the stock solutions for according to the F/2 standard protocol and additionally enriched with 1.5 mM NaH<sup>13</sup>CO<sub>3</sub> and for *P. tricornutum* (<sup>15</sup>N single labelled) with 1.5 mM NaHCO<sub>3</sub> (natural abundance) and with 0.9 mM NaNO<sub>3</sub> (Na<sup>14</sup>NO<sub>3</sub> : Na<sup>15</sup>NO<sub>3</sub> → 5.25 : 1) along with the stock solutions for the F/2 standard protocol.”

R1: Line 93. Is 28 PSU the same salinity as at the sampling site?

JW: The salinity range in our sampling underlies high seasonal and diurnal fluctuations depending on tidal activity, solar radiation, precipitation etc.. Our own measurements at the sampling site range between 24 PSU (water collected at high tide) and 31 PSU (water collected from a tidal pool at low tide).

We completed the sentence:

Line 131-132: “...which lies in the range of our measurements from seawater at the sampling site: 24 – 30 PSU.”

Additional adjustment in the method section: in the new manuscript, North Sea seawater is abbreviated as NSW. (Line 109: „...filtered North Sea water (NSW)”.)

R1: Lines 103-109 and 124-128. My suggestion is to explain the statistical treatment of the data in a separate section.

JW: The description of statistical treatment was transferred to a new section at the end of the Material and Methods section.

R1: Line 132: „The sediment core data, together with the data from laboratory experiments, were used to estimate (...)“ The authors combined sediment core data with data from laboratory experiments to estimate total foraminiferal biomass and foraminiferal C and N processing. My question is why? The data obtained from the sediment core („natural abundance“) should be compared (and not combined) with the ones obtained from the laboratory experiments, as experiments are a simplification of the natural environment.

JW: The sentence was changed:

Line 162-164: „The data from the laboratory experiments (individual TOC, TN, pC, pN), together with the foraminiferal abundances counted from the sediment core were used to estimate the range of foraminiferal contributions to sedimentary carbon and nitrogen pools and fluxes.”

JW: An additional section was added to the discussion, were we discuss the importance of laboratory results to estimate ranges of foraminiferal contributions to carbon and nitrogen fluxes and pools.

Line 314-334: „ Our phytodetritus uptake estimates propose, that the foraminiferal biomass consists of ~ 6 – 8% diatom-derived pC /TOC, with the major amount contained within *A. tepida* (compare Table 3). An *in-situ* feeding experiment with deep-sea foraminifera resulted in values of ~ 1 – 12% pC/TOC (Nomaki et al., 2005b). Similar *in-situ* incubations in the core of the oxygen minimum zone of the Arabian Sea report ~ 15% pC/TOC in epifaunal and shallow infaunal foraminiferal carbon uptake (Enge et al., 2014). *In-situ* incubations offer results closest to the natural responses of organisms in their natural habitat and enable precise estimates of foraminiferal nutrient fluxes. Although, specific microhabitat conditions can have a strong influence on organismic behaviour. The artificial conditions in laboratory experiments also have an influence on physiological analysis, therefore the obtained results should be treated with caution. However, our estimates lie in the same order of magnitude as the above mentioned *in-situ* studies and offer a basis for estimations on foraminiferal carbon and nitrogen fluxes. General variations in foraminiferal carbon and nitrogen budgets can be caused by different adaptations to variable food availability in different habitats. This can be achieved by different controls of energy metabolism (e.g. Linke, 1992) or different trophic strategies (e.g. Lopez, 1979; Nomaki et al., 2011; Pascal et al., 2008). Our results suggest, *A. tepida* has a higher relevance for intertidal OM processing than *H. germanica*. This can be mainly attributed to the sequestered chloroplasts within the cytoplasm of *H. germanica*. Kleptoplasty is a wide spread phenomenon in foraminifera, specifically in species inhabiting dysoxic sediments, where kleptoplasts could promote survival in anoxic pore waters (Bernhard and Bowser, 1999). They might be involved in biochemical pathways within the foraminiferal cytoplasm, e.g. the transport of inorganic carbon and nitrogen (LeKieffre et al., 2018). Further, transmission electron microscopic investigations on *H. germanica* report a very limited abundance of food vesicles (Goldstein and Richardson, 2018). Kleptoplast-bearing species might occupy a distinct niche concerning their energetic demands. Additionally, they might play a not yet discovered importance in the fluxes of inorganic or dissolved carbon and nitrogen compounds. However, secondary producers with high uptake rates and a quick response to particulate OM sources like *A. tepida* play a strong role in the biogeochemical carbon and nitrogen recycling.”



R1: Line 140. After decalcification, the authors kept the foraminiferal at 50°C to dry for three days. Are the authors using a published protocol? If so, please cite the reference. If not, is it possible that such a long drying step could have altered their results? ^

JW: The drying step is critical in the processing of EA-IRMS samples. It is important, that there is no moisture in the tin cups after complete decalcification (also, the tin cups containing the specimens have to be checked under the microscope to evaluate, if all individuals are on the bottom of the cup during/after addition of HCl to make sure that they are decalcified successfully). To our knowledge, drying at 50°C for 3 days does not alter TOC and TN, or 13C/12C and 15N/14N results, we used this method in many previous investigations (see added references below).

References to published protocol added:

Line 172: „(Enge et al., 2014, 2016; Wukovits et al., 2017, 2018)“

R1: Table 1, 2nd column. „50 – 55“. Are 50 the number of specimens used in the 24/fed experiment and 55 the number of specimens used in the 24/starved experiment? If so, please specify. [h] should be [hrs] for consistency with the rest of the manuscript.

JW: this was clarified in the text:

Line 130: „Fifty to fifty five specimens of *A. tepida* and or *H. germanica* respectively...“

## Results

R1: I invite the authors to consider reporting the data presented in figure 1 as an additional (supplementary?) table.

JW: The raw data of the measurements for this study is available as a supplementary table in the revised manuscript.

R1: Figure 1 c and d. Considering that the temperature is specified in the x axis, I do not think that the authors need to colour code the data points, also because the „middle“ shade of grey and the darker shade of grey cannot be easily distinguished. An alternative might be using different symbols for different temperatures. Also the meaning of „ns“ is not included in the caption.

JW: The data points are now all coloured in black. The meaning of „ns“ is now included in the caption.

Line 193: „...food/24 hrs starved;  $p < 0.05$ , pairwise permutation tests, ns = not significant“

R1: Figure 2a. Can the data be differentiated based on the temperature of the experiments? Maybe different symbols (or colors) can be used for this purpose.

JW: A color code was added for the data points temperatures in Figure 2a and is shown in the legend of the figure.

R1: Figure 2b. The figure is a bit confusing. Again, I would recommend using different symbols (or colors) for different trends.

JW: The figure was changed, now using different symbols for carbon and nitrogen release.

R1: Figure 3. Chlorophyte should Chlorophyte. Also not all symbols of the figure legend correspond to the symbols on the plots.

JW: "Chlorophyte" was changed in to "Chlorophyte". The figure was changed, the figure shows now uniform symbols which fit to the legend.

### Discussion

R1: The authors mention the presence of chloroplasts in *Haynesina germanica*. How about *Ammonia tepida* (cf. Jauffrais 2016).

JW: This is now already mentioned in the introduction of the revised mansucrite:

Line 167-169: „. In contrary, food-derived chloroplasts in *A. tepida* lose their photosynthetic activity already within two days (Jauffrais et al., 2016).“

R1: Line 294-296. I think the authors make a very interesting point here. Can they expand on this?

JW: The last paragraph was rewritten:

Line 356-367. „ Therefore, foraminiferal nitrogen release as  $\text{NH}_4^+$  or amino-acids could cover a considerable amount of the nutritional nitrogen demand in marine bacteria (cf. Wheeler and Kirchman, 1986), which assimilate  $\text{NH}_4^+$  (and amino acid-derived  $\text{NH}_4^+$ ) to sustain their glutamate-glutamine cycle. Vice versa, the labile dissolved organic matter derived from bacterial decomposition of refractory organic matter provides a valuable food source for some benthic foraminifera, and is indispensable for the reproduction of some foraminiferal species (Jorissen et al., 1998; Muller and Lee, 1969; Nomaki et al., 2011). In many marine diatoms, which are the main drivers of marine primary productivity,  $\text{NH}_4^+$  is the preferred source for nitrogen uptake over  $\text{NO}_3^-$  (Sivasubramanian and Rao, 1988). Foraminifera could act as important nutrient providers for closely associated diatoms, which are also considered as one of their main food sources (Lee et al., 1966). Consequently, the kleptoplast-hosting metabolism in *H. germanica* could benefit from regenerated nitrogen sources by the high OM mineralization rates in *A. tepida*. In summary, foraminiferal carbon and nitrogen fluxes constitute an important link in the food web complex of primary consumers and decomposers.

## Minor comments

R1: Line 12. Should ,13C & 15N' be ,<sup>13</sup>C & <sup>15</sup>N'? This comment applies to the rest of the manuscript.

JW: 13C & 15N were substituted by <sup>13</sup>C and <sup>15</sup>N.

R1: Line 14-19. Throughout the manuscript, the results obtained in *A. tepida* are discussed before those obtained in *H. germanica*. I recommend maintaining the same structure in the abstract, as well.

JW: The sequence in the abstract was changed:

Line 13 – 21: “*Ammonia tepida* showed a very high, temperature-influenced intake and turnover rates with more excessive carbon turnover, compared to nitrogen. The quite low metabolic nitrogen turnover in *H. germanica* was not affected by temperature and was higher than the carbon turnover. This might be related with the chloroplast husbandry in *H. germanica* and its lower demands for food derived nitrogen sources. *Ammonia tepida* prefers a soft chlorophyte food source over diatom detritus, which is harder to break down. In conclusion, *A. tepida* shows a generalist behaviour that links with high fluxes of organic matter (OM). Due to its high rates of OM processing and abundances, we conclude that *A. tepida* is an important key-player in intertidal carbon and nitrogen turnover, specifically in the short-term processing of OM and the mediation of dissolved nutrients to associated microbes and primary producers. In contrast, *H. germanica* is a highly specialized species with low rates of carbon and nitrogen budgeting.”

R1: Line 25: „Coastal sediments represent the largest pool of marine particulate organic matter (OM)...’ Can the authors add some numbers (maybe a percentage?) regarding how big the OM pool is in coastal sediments? In my opinion, such a number will provide a good context to discuss the data obtained from the experiments and to discuss the importance of remineralization processes mediated by benthic foraminifera in coastal environments.

JW: The following sections have been added:

Line 24-31: „Oceanic and terrestrial systems are connected by the carbon cycling in coastal waters, which contribute to a major part of the global carbon cycles and budgets (Bauer et al., 2013; Cai, 2011; Cole et al., 2007; Regnier et al., 2013). Estuaries are an important source for organic matter in coastal systems and were estimated to account for ~ 40% of oceanic phytoplankton primary productivity (Smith and Hollibaugh 1993). Most estuarine areas are considered to be net heterotrophic, or act as carbon sinks, respectively (e.g. Caffrey, 2003, 2004; Cai, 2011; Herrmann et al., 2015). In general, 30% of overall coastal carbon is lost by metabolic oxidation (Smith and Hollibaugh 1993).”

Line 336-341: “As mentioned above, in the heterotrophic, coastal zone 30% of the carbon pool are lost as via respiration. On the other hand, dissolved organic carbon sources from organismic excretion can serve as an important nutrient source for bacteria (e.g., Kahler et al., 1997; Snyder & Hoch, 1996; Zweifel et al., 1993). Therefore, the fast processing of OM in *A. tepida* might be an

important sink for inorganic carbon (CO<sub>2</sub> respiration) and at the same time a link for dissolved organic carbon sources in intertidal carbon and nitrogen fluxes.”

R1: Line 36: „e.g., temperature or OM quality“. This should be „temperature and/or OM quality“.

JW: this was changed according to the reviewers suggestion.

R1: Lines 40-41 and 47-48. These sentences are not very clear. Please rephrase.

JW: these sentences were rephrased as follows:

Line 49-53: „Typically, tidal flats offer a high availability of food sources for phytodetrivores or herbivores feeding on microalgae. But dense populations of *A. tepida* communities can deplete sediments from OM sources and consequently control benthic meiofaunal community structures (Chandler, 1989). Therefore, resource partitioning or different metabolic strategies can be beneficial for foraminifera which share the same spatial and temporal habitats.”

Line 82-85: “Therefore, seasonal temperature fluctuations and human induced global warming can have a strong impact on foraminiferal community compositions and foraminiferal C & N fluxes.”

2 further sentences were added: “In estuaries e.g. temperature acts in many cases as the most controlling factor on metabolic rates and hence on net ecosystem metabolism (Caffrey, 2003). Therefore, this factor was included in one of our observations concerning foraminiferal OM processing.”

R1: Lines 58-59. Considering that the experiment described at lines 58-59 is Experiment #2, I suggest moving this sentence after the sentence at lines 60-61, which refers to Experiment #1.

JW: This shift was done:

Line 90-94: „We compared diatom detritus intake and retention of food-derived carbon (pC) and nitrogen (pN) of *A. tepida* and *H. germanica* at three different temperatures (15°C, 20°C, 25°C). The evaluation of the metabolic costs of pC and pN during a 24 hour starvation period can further help to explain species specific OM processing due to metabolic nutrient budgets. Further, both food sources were offered simultaneously to *A. tepida* to identify feeding preferences of this species.“

R1: M2 should be m<sup>2</sup>

JW: replaced with m<sup>2</sup>

R1: „Individuals were picked from the sediment in sufficient and collected (...)“. In sufficient number?

JW: Yes, sentence was completed:

Line 108: „Foraminifera were picked from the sediment in sufficient number and collected (...)“.

R1: Line 77: „*Dunaliella tertiolecta* and *Phaeodactylum tricornutum*“. The scientific name was already defined at line 58, so this should be *D. tertiolecta* and *P. tricornutum*. This comment applies to the rest of the manuscript, with the exception of tables and figures.

JW: These changes were carried out.

R1: „The experiments started after accumulation of sufficient foraminiferal material three weeks after the field sampling.“ I assume the authors achieved foraminiferal reproduction during the initial incubation. If my assumption is correct, then it would be good to specify so and provide some information about the conditions used to maintain the foraminifera prior the beginning of the experiments. If the authors know, it might be of interest to know how successful the reproduction event was.

JW: Upon arrival at the lab, the sediment was immediately transferred into aerated aquaria containing filtered seawater at the sampling site. We did not monitor reproduction during the incubation period.

The following sentence was added to the revised manuscript:

Line 107-108: „The sediment samples were kept within aquaria, containing filtered water collected at the sampling site.“

R1: Line 84. NaH<sup>13</sup>CO<sub>3</sub>, Na<sup>15</sup>NO<sub>3</sub> should be NaH<sup>13</sup>CO<sub>3</sub>, Na<sup>15</sup>NO<sub>3</sub>.

JW: changed.

R1: Line 88. C.f. should be cf. This comment applies to the rest of the manuscript.

JW: changed.

R1: Line 108. What do the authors mean with „carbon and nitrogen costs of the two species during the period without food“?

JW: sentence changed: Line 196-197: „...metabolic carbon and nitrogen loss of the two species during the period without food.“

R1: Line 114. Cm-2 should be cm<sup>-2</sup>.

JW: changed.

R1: Line 135. A parenthesis is missing.

JW: Parenthesis added.

R1: Line 137. I suggest including the word „cytoplasm“ prior „isotope analysis“, for clarity.

JW: The word „cytoplasm“ was included.

R1: Line 153 (formula #2). atomXsample – should this be atom%Xsample? Same for background.

JW: „atomXsample“ was replaced by „atom%Xsample“ in both cases.

R1: Line 155. I recommend writing the  $I_{iso}$  formula as the other formulas, for clarity.

JW: The  $I_{iso}$  formula was written as the other formulas.

R1: Line 155. There is an extra period after Table 2.

JW: Extra period removed.

R1: Line 205. No comma needed.

JW: Comma removed.

R1: Line 212. *Phaeodactylum tricornutum* should be italic.

JW: *Phaeodactylum tricornutum* was changed to „*P. tricornutum*“.

R1: Section 4.1 revise references – e.g., a comma is missing between the authors' names and the year of publication and a semicolon should be used to separate different references.

JW: The reference style was adapted to biogeosciences.

R1: Line 232. Missing parenthesis.

JW: Parenthesis added.

R1: Line 250. Almagor et al. – publication year 1981.

JW: Publication year added.

R1: Lines 281 and 295. Missing parenthesis around the year of publication.

JW: Parenthesis added.

R1: Lines 288 and 295. Comp. should be probabyl cf.

JW: Comp. replaced by cf.
